# Supplementary material for: Identification of lncRNA-associated competing triplets reveals global patterns and prognostic markers for cancer
Source: PubMed Central journal article supplement — Nucleic Acids Res. 2015 Mar 23;43(7):3478–89. doi: 10.1093/nar/gkv233 (PMC4402541; doi:10.1093/nar/gkv233), 2015-03-23
Supplement: supp_gkv233_nar-00028-n-2015-File008.pdf [file supp_gkv233_nar-00028-n-2015-File008.pdf]

## Supplementary Methods

### Assessment of similarities between miRNA target predictions

The similarity between two target prediction results A and B was defined as the union of the two datasets divided by the intersection.

$$\text{Similarity} = \frac{A \cap B}{A \cup B}$$

The range of similarity values is between 0 and 1, with a higher value indicating a higher degree of similarity between two datasets.

### Comparison analysis of miRNA target prediction methods

A comparative analysis was carried out to test whether integrating different algorithms is superior to using a single algorithm by itself. The overlap of miRanda, PITA, TargetScan, RNAhybrid, and their integration with experimentally validated miRNA-lncRNA datasets from starBase v.2.0 (1) and DIANA-lncBase (2) was examined. The significance of the enrichment in overlap between individual methods and the validated dataset was calculated by hypergeometric testing. If N is the total number of all possible miRNA-lncRNA interactions, of which K are included in the validated dataset, and the analytical method of interest has a total of M interactions, of which x overlap with the validated dataset, then the P value corresponding to the significance of enrichment can be calculated as follows:

$$P = 1 - \sum_{t=0}^x \frac{\binom{K}{t} \binom{N-K}{M-t}}{\binom{N}{M}}$$

### Evaluation of competing activity score

To test whether the competing activity score is a valuable measurement for the evaluation of the strength of competition in lncACTs, we carried out following analysis:

#### **Comparisons between gold standard triplets and 10-fold random lncACTs**

PTEN-associated competing triplets (PTENACTs; n = 137) from an extensive ceRNA sub-network that included PTEN, RB1, STAT3, PDGFRA, RUNX1, VEGFA, and their competing miRNAs were identified and experimentally validated in a previous study (3). These were taken as gold standard PTENACTs. For each PTENACT, 10 random competing activity scores were generated by randomly shuffling the expression profiles. PTENACTs competing activity score were significantly higher than random scores across 12 types of cancer (Fig. S4).

#### **Comparisons between gold standard triplets and 10-fold negative triplets**

Negative examples were randomly derived from 289 negative miRNA-target interactions. The miRNA target pairs were used as negative training examples for mining miRNA-target interactions (4); for each pair, two candidate RNAs (lncRNAs or mRNAs) were identified as lncACTs if they interacted with a common miRNA. In this step, a threshold P value < 0.05 was used for hypergeometric testing. The gold standard and negative lncACTs were merged into a list ranked by competing activity score in descending order for which dynamic thresholds (ranging from minimum to maximum of competing activity scores) were used as cut-off points. Ranking was determined by calculating sensitivity and

specificity (i.e., frequency of gold standards ranked above or below a given cut-off point, respectively). We plotted receiver operating characteristic (ROC) curves using the competing activity scores of the lncACTs to facilitate the comparison between PTENACTs and 10-fold negative lncACTs (Fig S5). In a ROC curve, the sensitivity (true positive rate) is plotted as a function of 1-specificity (false positive rate) for different thresholds. We found high AUC values (from 0.81 to 0.98) for ROC curves across 12 cancers. These results indicated that competing activity scores can give high levels of precision to distinguish positive lncACTs from negative lncACTs.

## Supplementary Figure Legends

**Figure S1.** Evaluation of accuracy of our coding/lncRNA gene quantification pipeline. For OV data (A) and UCEC data (B), we plotted our recalculated RPKM values against the true RPKM values, calculated by Akrami et al. High linear correlation was observed between recalculated RPKM and true RPKM values for both OV ( $R^2=0.92$ ) and UCEC ( $R^2=0.95$ ) datasets. The  $R^2$  and F-statistic P-values, calculated by robust linear regression analysis, are shown in each figure. Linear fitting lines are indicated in red. X and Y axes were plotted in the log<sub>2</sub> scale.

**Figure S2.** (A) Venn diagram of the overlap between miRNA-lncRNA interactions predicted using four methods. (B) The similarity between RNAhybrid and PITA results was only 5.13%; the highest similarity was observed between miRanda and TargetScan results at 24.10%. The total number of differentially predicted results is shown on the bottom line. A 5.8-fold difference was observed between the number of results predicted by RNAhybrid (3,502,121) and miRanda (606,081). Similarities between predictions from RNAhybrid and miRanda was 13.07%, while between RNAhybrid and PITA, the IR was only 5.1%. These results indicate a considerable divergence in miRNA-binding sites predicted using the four methods.

**Figure S3.** Comparison of different miRNA-lncRNA prediction methods overlapping with validated dataset. The integration method hosts the most number of experimentally validated miRNA-lncRNA interactions than other methods. Hypergeometric test indicated that the overlap between integration method and validated dataset has the most significant enrichment P value.

**Figure S4.** Individual and box plot comparison of competing activity scores between PTENACTs (red points) and random (green points) lncACTs. The scores of PTENACTs were significantly higher than random scores across 12 types of cancers. Significant P values were calculated by the Mann-Whitney U-test

**Figure S5.** The ROC curves (blue lines) used to distinguish PTENACTs from negative lncACTs, based on the competing activity score. The AUC score is the most frequently used measure for the evaluation of algorithm performance. For example, an AUC score of 1 indicates that every tested gene ranked prior to other genes, whereas a value of 0.5 indicates that the tested genes were randomly ranked throughout the list.

**Figure S6.** Illustration of lncACT crosstalk network construction. The lncRNAs, miRNAs and coding-genes are colored blue, red and yellow, respectively. Their interactions are indicated by black lines. (A) Illustration of how a single lncACTs is represented. On the left panel, miRNAs can bind to lncRNA and coding gene molecules based on complementary seed sequence. The lncRNAs can compete with coding genes by sharing miRNA binding sites. This kind of competing status between different RNA molecules can be represented as nodes and edges in the network in the right panel. (B) Illustration of how the lncACT network is represented. It was assumed that lncRNAs and mRNAs in one lncACT compete for binding to miRNAs within other lncACTs (left panel). This type of crosstalk can be represented in the network by adding edges of related lncACTs (right panel). The constructed intricate transcriptional regulatory network can aid studies into how intermolecular relationships dictate cellular behavior.

**Figure S7.** Detailed comparison of disease-associated and other nodes. Based on topological characteristics of the network, disease-associated nodes were found to have a higher degree and betweenness centrality than other nodes.

**Figure S8.** A genome-wide map of 5,119 functional lncACTs based on Circos-style visualization. Outer circles indicate human chromosomes and genomic locations of lncRNAs (blue), miRNAs (red), and coding genes (yellow) of lncACTs. Lines within the circle denote pairs of miRNA-lncRNA (blue) and miRNA-gene (red) interactions. Detailed maps for each cancer are shown in the bottom panel.

**Figure S9.** Detailed functional comparison between different methods. (A, B) The GO terms identified by starBaseV2.0 and Linc2GO are listed on the bottom and ranked from left to right, based on the significant P-value. The GO terms identified by our method were mapped to these lists and are indicated as black bars. To investigate functional similarity, we calculated the enrichment score using a slipping window (width=100 terms, step=1 term) along the lists. In each slipping step, the enrichment score was calculated as the number of mapped GO terms/window width. The blue curve of the enrichment score was generated by slipping the window along the list. We found that GO terms identified by our method were enriched on top of the starBaseV2.0 and Linc2GO lists. (C, D) Comparison of enriched KEGG pathways (top ten) with starBaseV2.0 and Linc2GO. Pathways were indicated by red underlines if they were also identified in the top ten pathways of our method. These results indicated that starBaseV2.0 and Linc2GO identified similar functions to our method.

**Figure S10.** Construction of cancer-specific sub-networks. Each of 10 cancer-specific clusters (left) were converted into a sub-network as follows (right): (a) lncRNA-miRNA-mRNA interactions in the lncACT cluster were identified; (b) lncRNAs, miRNAs, and mRNAs were represented as nodes, and interactions between them were represented as edges; (c) repeated values were merged into single nodes and edges; (d) nodes and edges were used to construct a cancer-specific sub-network. Clusters 4 and 6 were integrated into the same BRCA-specific sub-network.

**Figure S11.** Detailed information for nine cancer-specific sub-networks. Similar to the global network, sub-networks had a layered organization, with lncRNAs (blue), miRNAs (red), and coding genes (yellow) as nodes.

**Figure S12.** Degree distribution of nine cancer-specific sub-networks. Similar to the global network, sub-networks presented a scale-free structure.

**Figure S13.** Kaplan-Meier survival analysis to test whether the HB\_module can better distinguish patients than lncRNAs/miRNAs/mRNAs or combinations thereof. Survival curves of classification based on each node of the HB\_module (A-N), integration of BRCA2 and miR-20b (O), H19- and BRCA1/2-associated lncACTs (P and Q, respectively), and all lncRNAs, miRNAs, and coding genes in the HB\_module (R, S, and T, respectively) were generated. Patients showing no progression or who were still alive at the time of the last follow-up were censored (+). P values were calculated by the log-rank test.

**Figure S14.** The use of lncACTs to predict the clinical outcomes of cancer patients. The survival analysis revealed that lncACT modules could distinguish patients with different clinical outcomes in (A) BRCA, (B) BLCA, (C) LUSC, (D) LUAD, (E) UCEC and (F) KIRP.

From (A) to (F), the topological graph for each functional module is illustrated in each panel (top). The lncRNAs, miRNAs and coding-genes are colored blue, red and yellow, respectively. The expression heat map is shown on the middle panel. Highly expressed genes are shown in red, low expression genes are shown in green. A corresponding Kaplan-Meier survival plot (bottom) of the two patient subgroups, identified by hierarchical clustering of expression profiles (middle), was generated. Patients that showed no progression or who were still alive at the time of the last follow-up were censored (+). Survival days are shown along the X axis. Overall survival rates are shown along the Y axis.

**Figure S15.** Kaplan-Meier survival analysis of single nodes in the miR-335-associated network module. The nodes could not distinguish BRCA patients. Patients showing no progression or who were still alive at the time of the last follow-up were censored (+). P values were calculated by the log-rank test.

**Figure S16.** An overview of the online website framework. (1) A browse module of the database. (2) A flexible gateway to search for relevant lncACTs. (3) Functional annotation tools based on KEGG and GO for lncACTs or lncRNAs. (4) Retrieval of lncACTs based on user-provided expression profiles. (5) A built-in multi-track visualization platform that allows users to browse genome-wide lncACTs. (6) Downloading corresponding datasets. (7) Links to relevant sources of functional data. Downloadable description of the website working principles and user manual are also provided.

**Figure S17.** Illustration of a potential mechanism to explain the inverse expression patterns of DANCR-miR222-TCEAL1 lncACT.

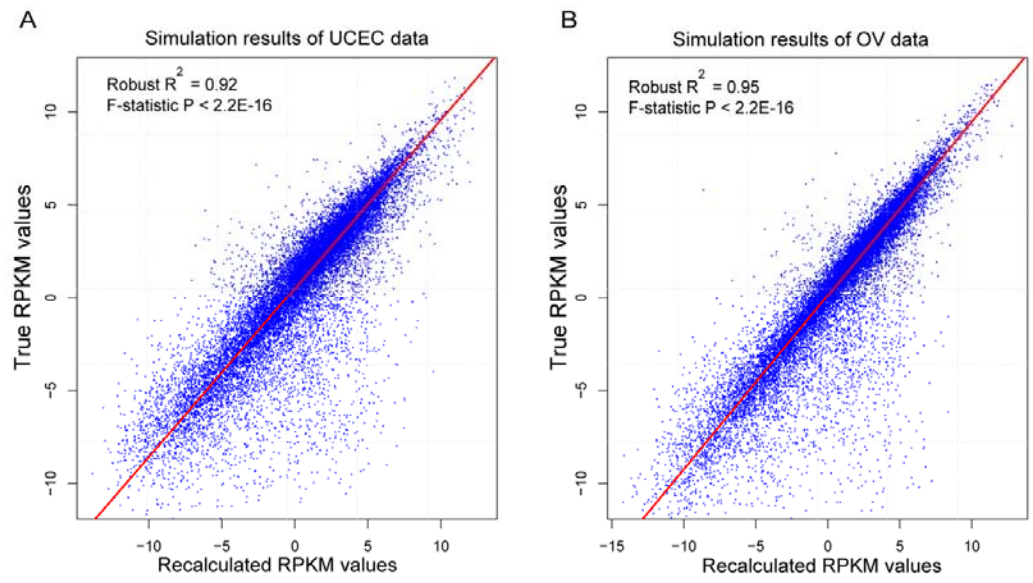

Figure S1

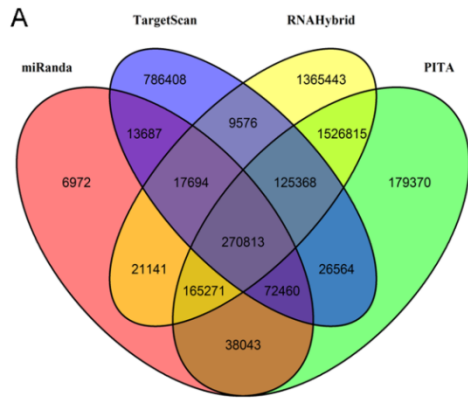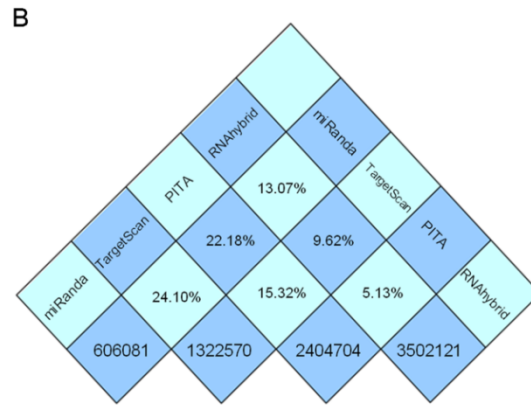

Figure S2

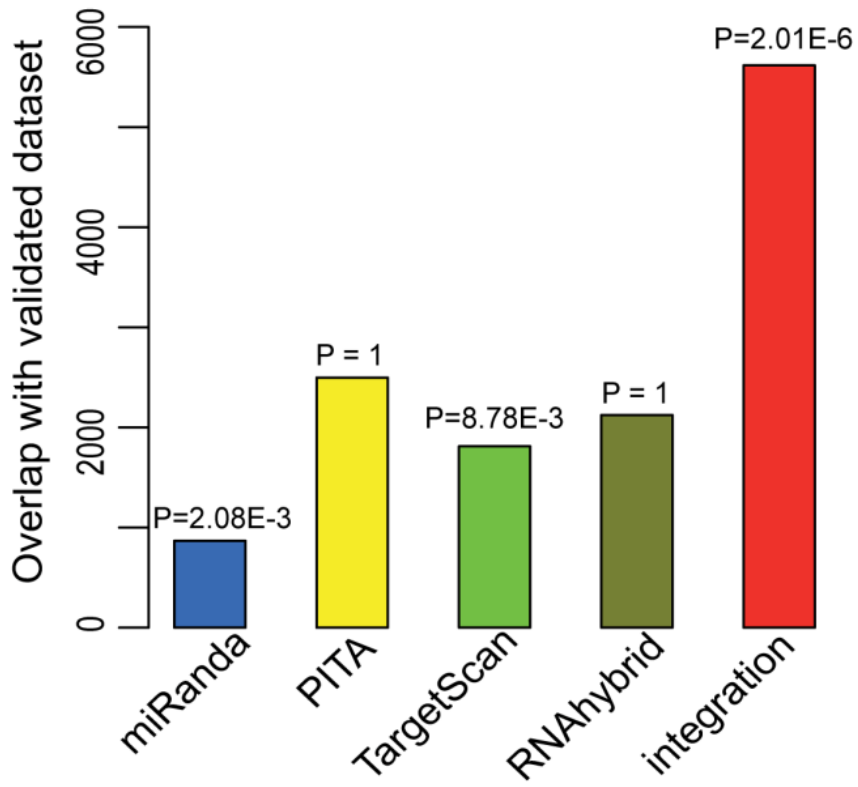

Figure S3



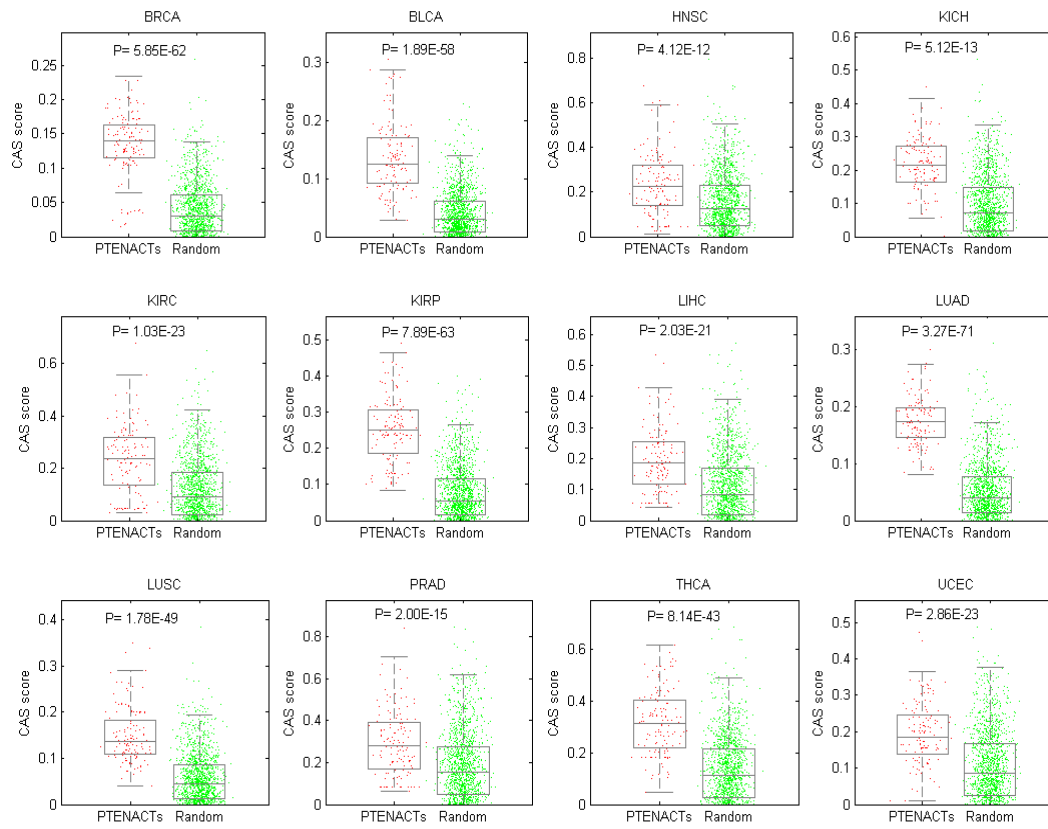

Figure S4

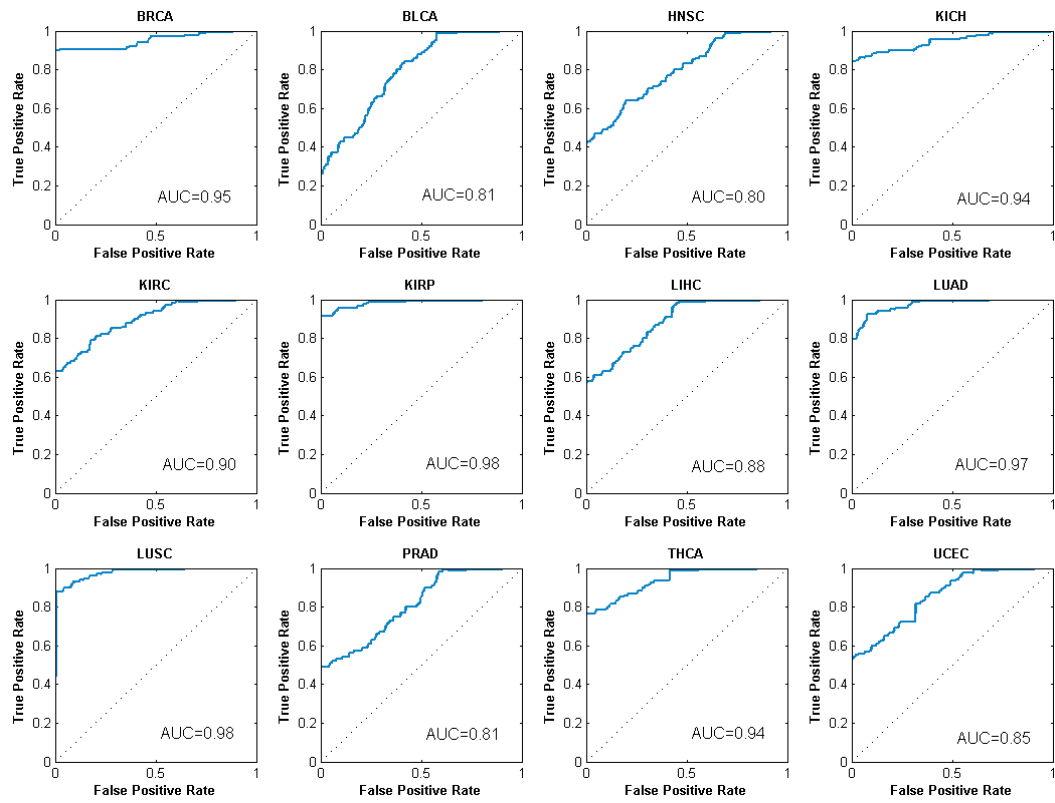

Figure S5

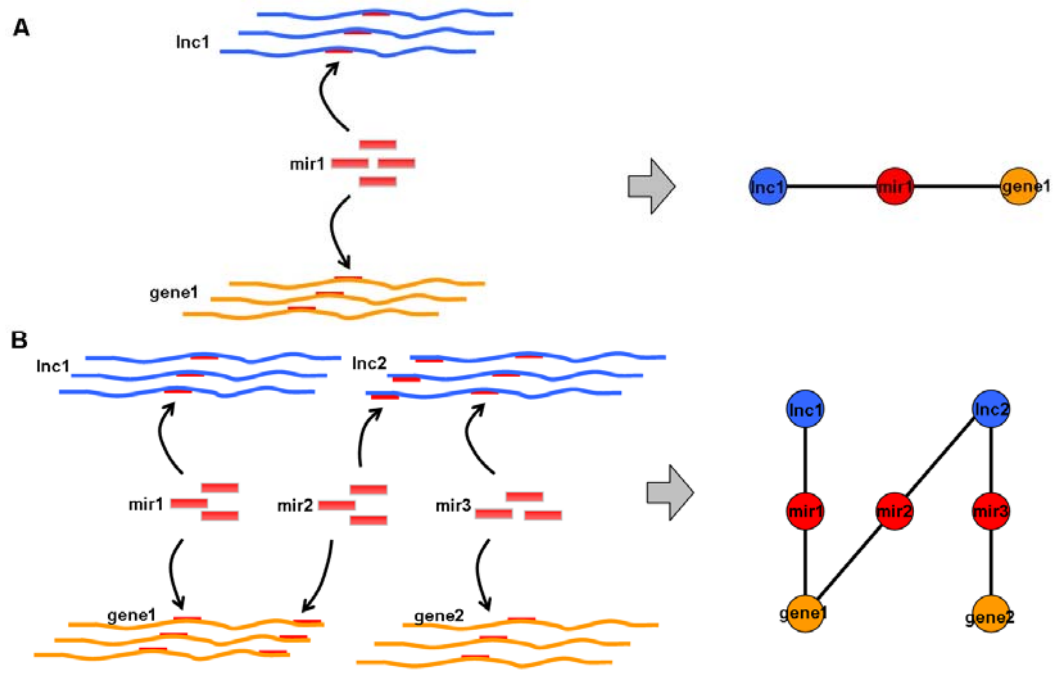

Figure S6

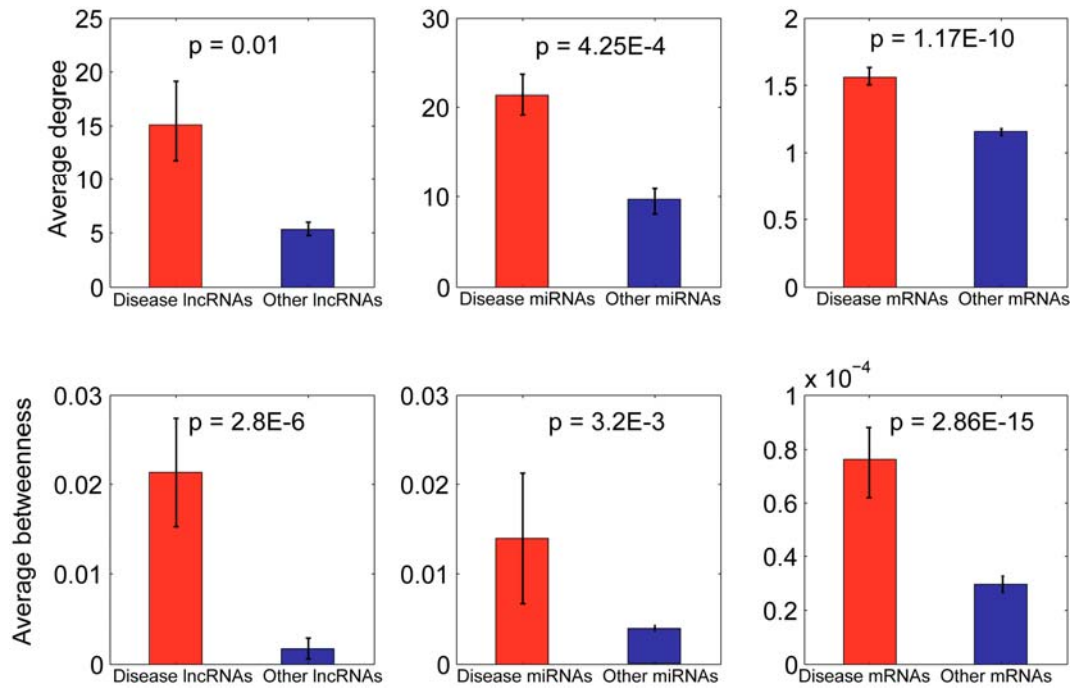

Figure S7

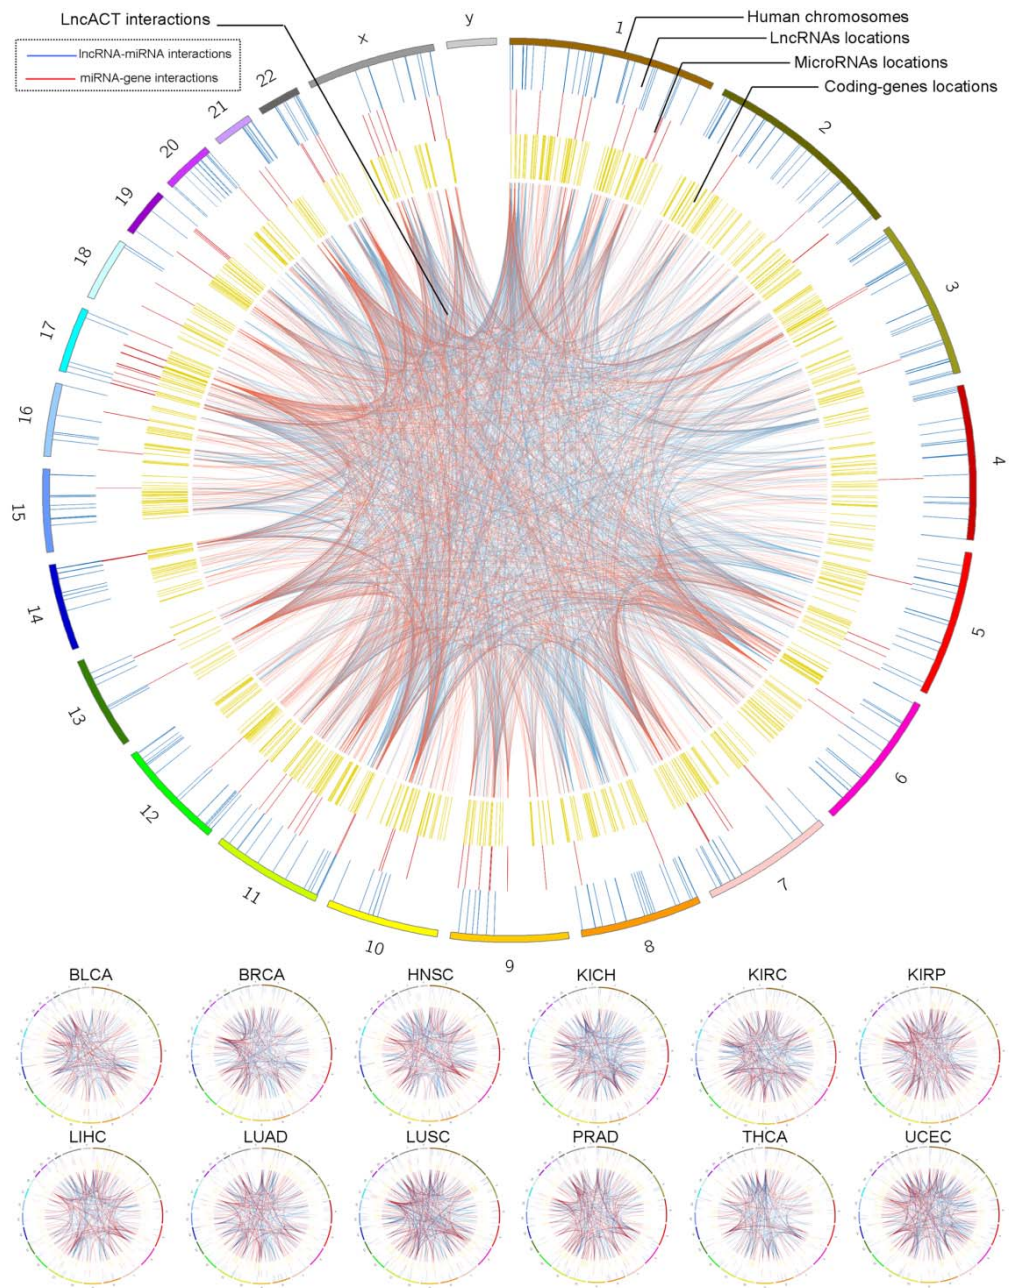

Figure S8

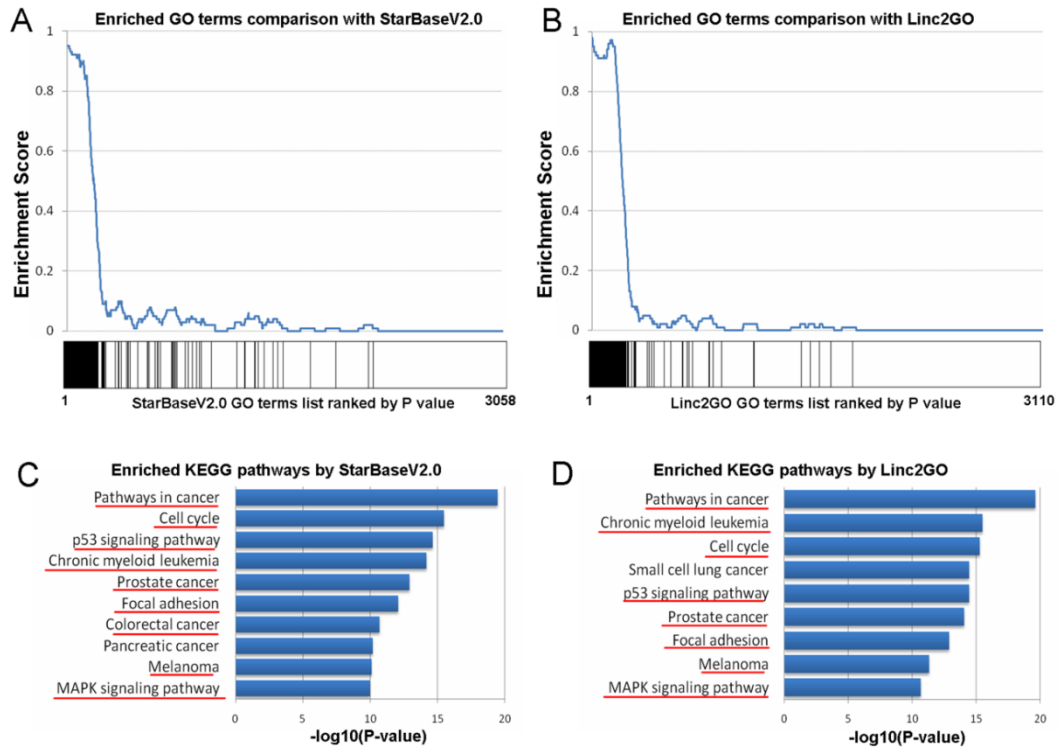

Figure S9

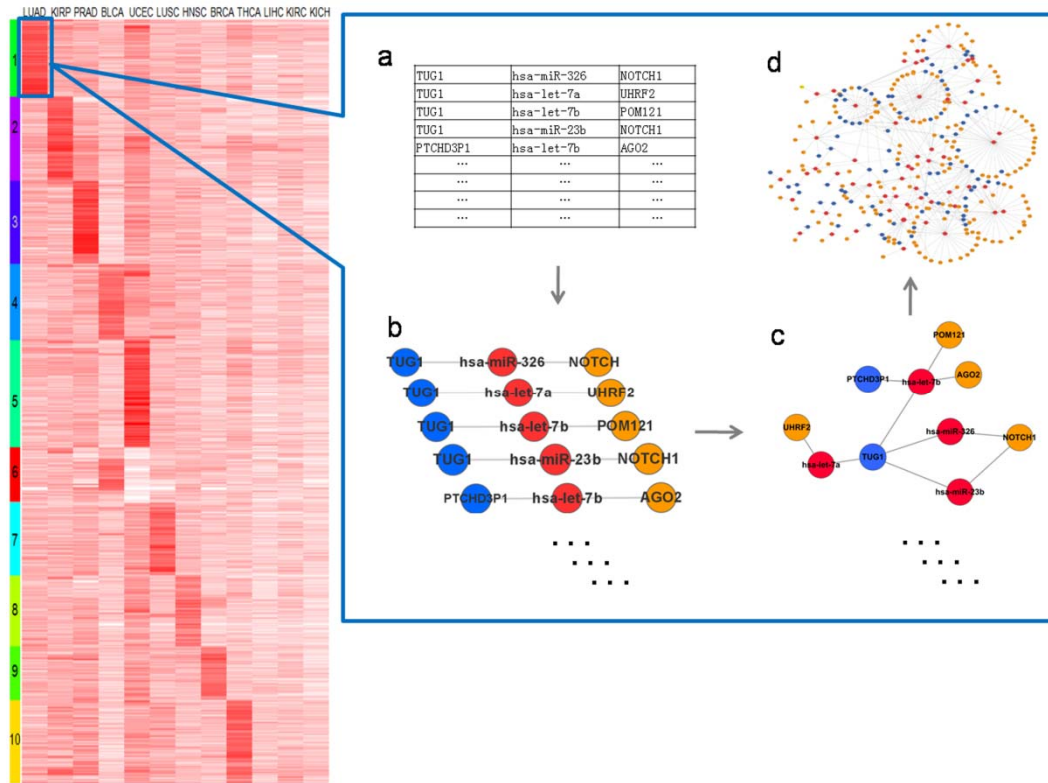

Figure S10

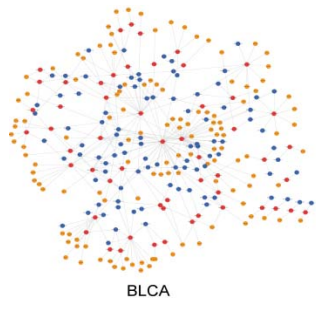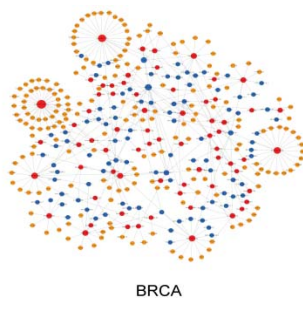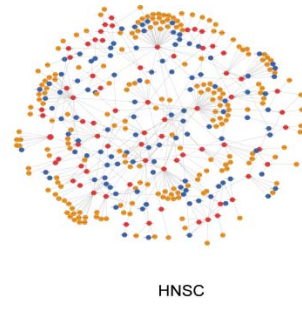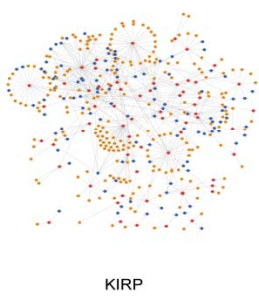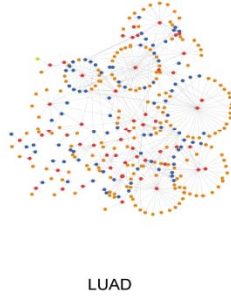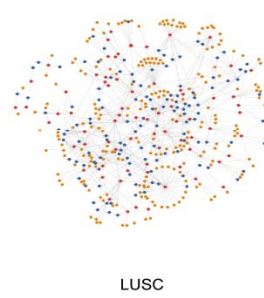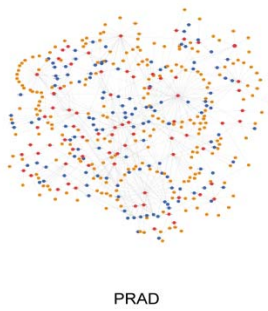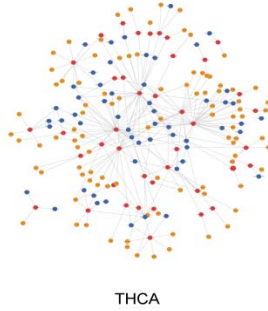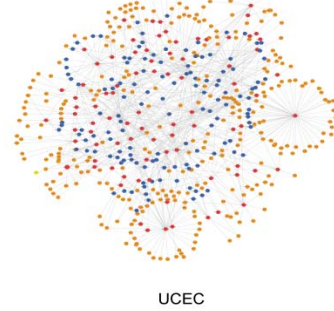

Figure S11



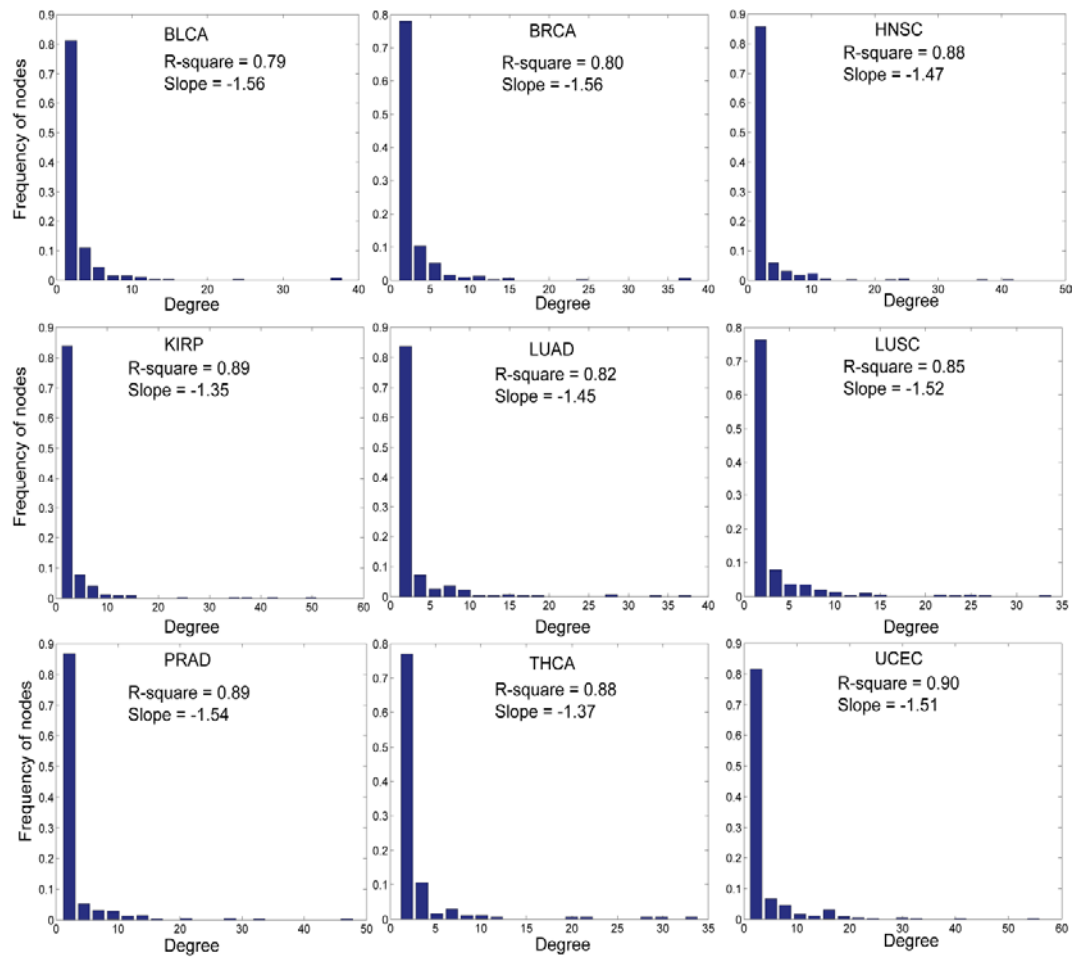

Figure S12

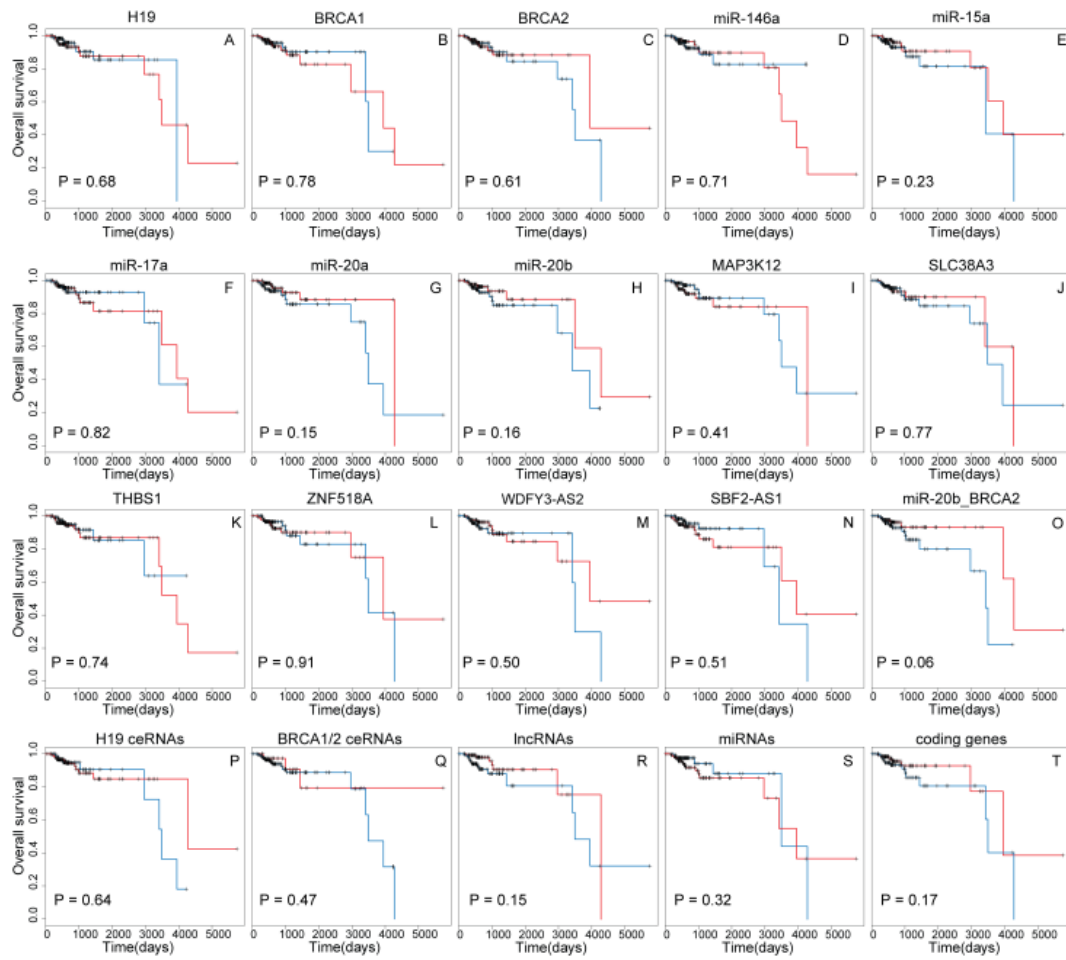

Figure S13

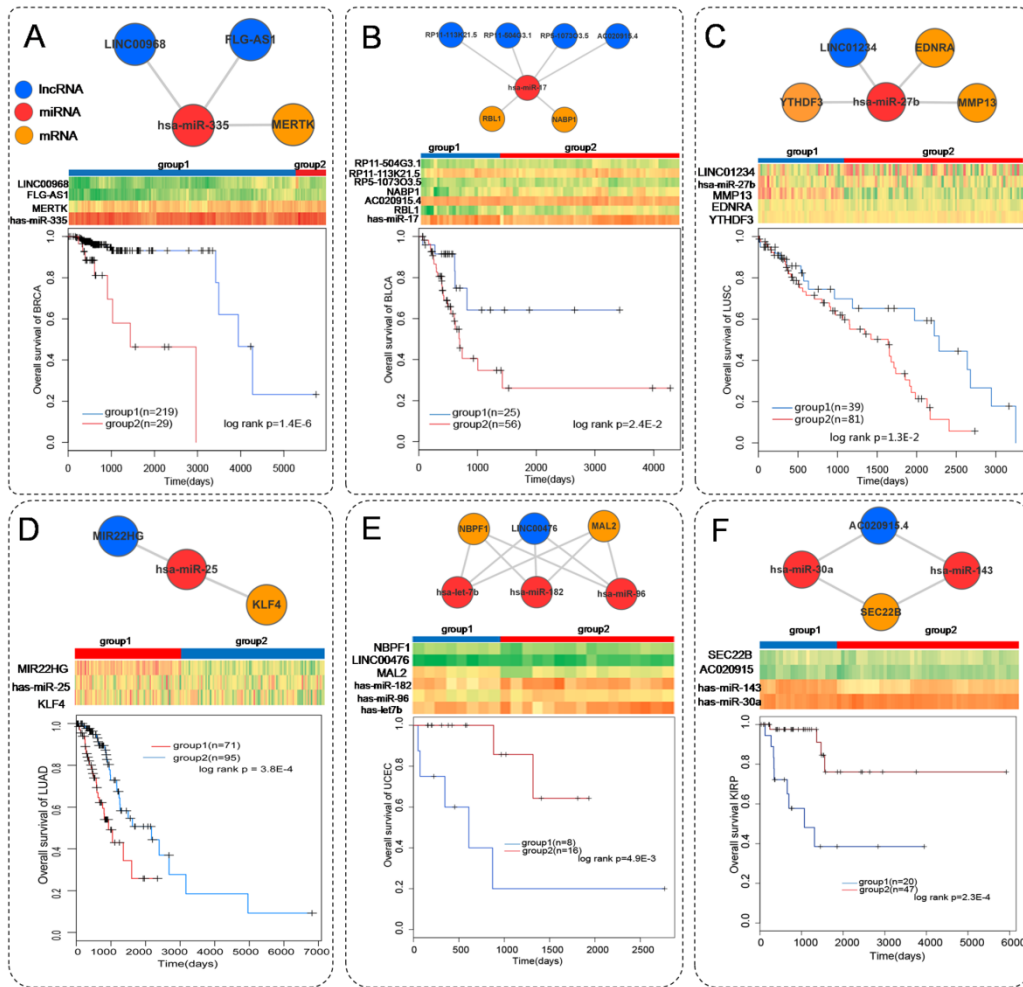

Figure S14

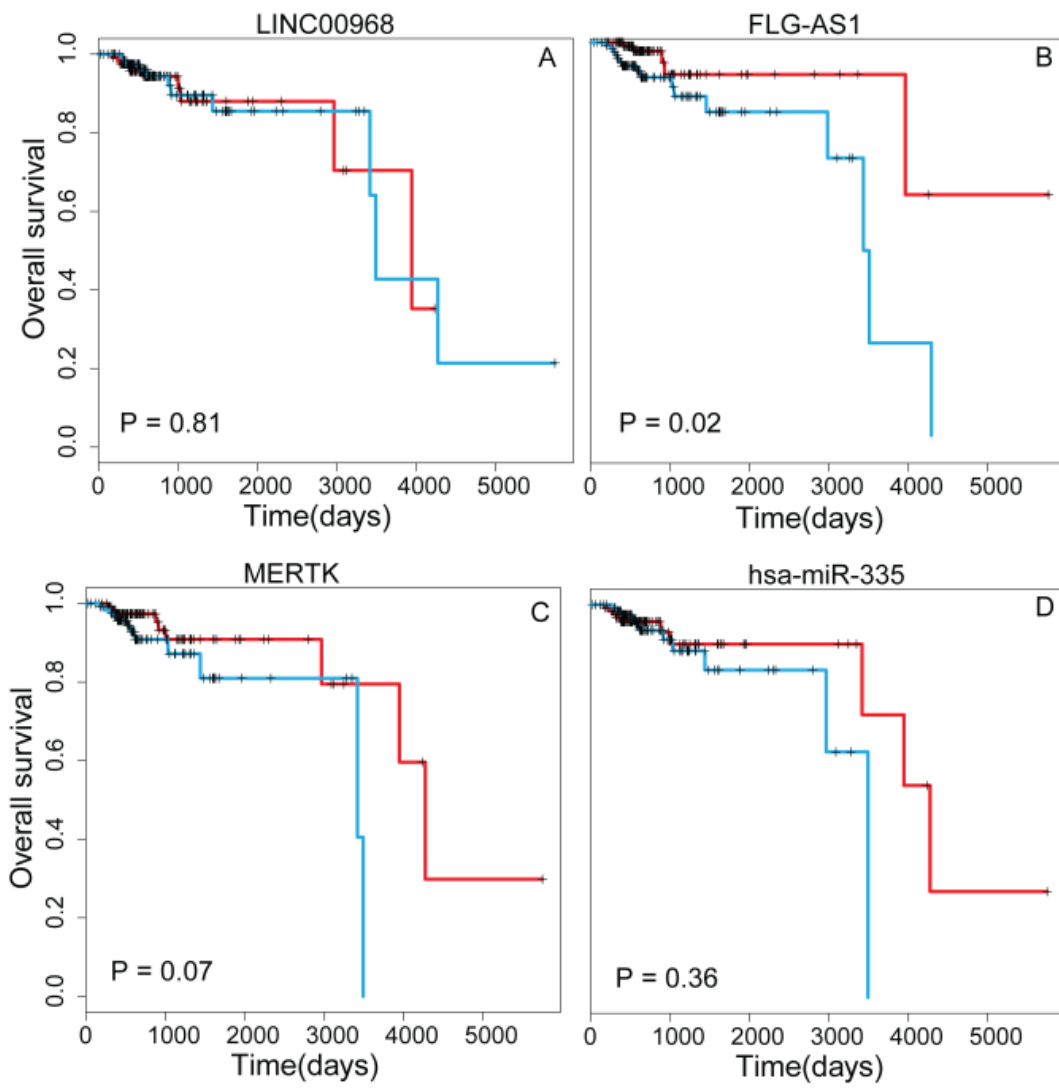

Figure S15

College of Bioinformatics Science and Technology, HBU

## LncACTdb: LncRNA-associated Competing Triplets DataBase

Home Search Browse LncACTFun LncACTGet LncACTView Download Links Help

Browse by:

- 1. LncRNAs
- miRNAs
- genes
  - 2. AACS
  - AACS1
  - AACA1
  - ABC6
  - ABC1
  - ABC9
  - ABC11
  - ABC3
  - ABC4
  - ABC11
  - ABC2
  - ABC10
  - ABC11
  - ABC5
  - ABL1
  - ACA2
  - ACAM
  - ACE2
  - ACTL2
  - ACTA2
  - ACT1
  - ACT1
  - ACT1A
  - ACTB
  - ACT1
  - ACT1B
  - ACT1C
  - ACT2A
  - ADAM10

3. Quick Search for lncRNA-miRNA-Competing triplets

4. Advanced Search for lncRNA-miRNA-Competing triplets

5. Available Targets

6. DOWNLOAD

- Experimental validated miRNA targets
- Functionally activated lncACTs
- Cancer-associated lncACTs
- Long noncoding RNAs datasource

7. Experimental validated miRNA target characteristics

8. Predicted miRNA target characteristics

Figure S16

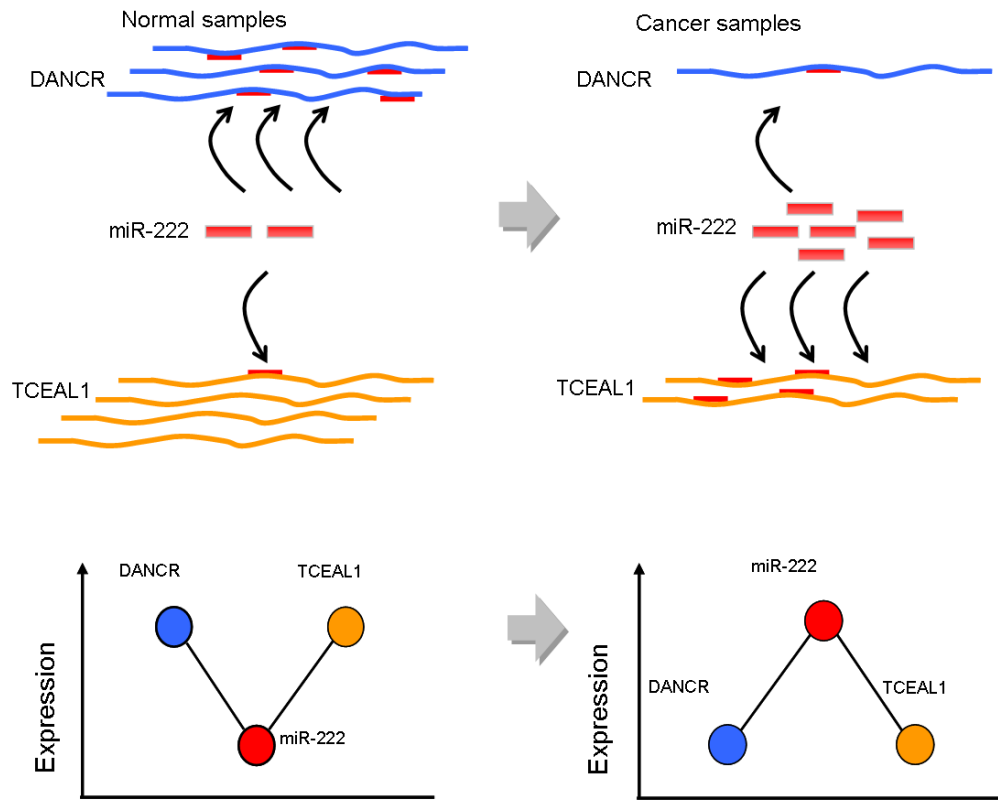

Figure S17

**Supplementary Table S1.** RNA sequencing data for 12 types of cancer from TCGA

| <b>Abbreviations</b> | <b>Cancer names</b>                   | <b>No.of samples</b> |
|----------------------|---------------------------------------|----------------------|
| BLCA                 | Bladder Urothelial Carcinoma          | 81                   |
| BRCA                 | Breast invasive carcinoma             | 248                  |
| HNSC                 | Head and Neck squamous cell carcinoma | 158                  |
| KICH                 | Kidney Chromophobe                    | 50                   |
| KIRC                 | Kidney renal clear cell carcinoma     | 30                   |
| KIRP                 | Kidney renal papillary cell carcinoma | 67                   |
| LIHC                 | Liver hepatocellular carcinoma        | 71                   |
| LUAD                 | Lung adenocarcinoma                   | 166                  |
| LUSC                 | Lung squamous cell carcinoma          | 120                  |
| PRAD                 | Prostate adenocarcinoma               | 59                   |
| THCA                 | Thyroid carcinoma                     | 229                  |
| UCEC                 | Uterine Corpus Endometrioid Carcinoma | 24                   |

**Supplementary Table S2.** List of lncRNAs used in this work which identified from TCGA RNA-seq data.

| <b>Ensembl ID</b> | <b>lncRNA Name</b> | <b>Ensembl ID</b> | <b>lncRNA Name</b> |
|-------------------|--------------------|-------------------|--------------------|
| ENSG00000093100   | XXbac-B461K10.4    | ENSG00000237125   | HAND2-AS1          |
| ENSG00000100181   | TPTEP1             | ENSG00000237149   | ZNF503-AS2         |
| ENSG00000122043   | LINC00544          | ENSG00000237152   | DLEU7-AS1          |
| ENSG00000124915   | DKFZP434K028       | ENSG00000237159   | CNTFR-AS1          |
| ENSG00000125514   | LINC00029          | ENSG00000237166   | AC007163.3         |
| ENSG00000125804   | FAM182A            | ENSG00000237187   | NR2F1-AS1          |
| ENSG00000126005   | MMP24-AS1          | ENSG00000237188   | RP11-337C18.8      |
| ENSG00000129816   | TTY1B              | ENSG00000237212   | RP11-569G13.2      |
| ENSG00000129845   | TTY1               | ENSG00000237233   | RP11-809M12.1      |
| ENSG00000130600   | H19                | ENSG00000237248   | LINC00987          |
| ENSG00000131007   | TTY9B              | ENSG00000237250   | RP11-193H5.1       |
| ENSG00000131538   | TTY6               | ENSG00000237267   | RP11-181F12.1      |
| ENSG00000131548   | TTY6B              | ENSG00000237292   | RP11-540K16.1      |
| ENSG00000132204   | LINC00470          | ENSG00000237298   | TTN-AS1            |
| ENSG00000132832   | LINC01260          | ENSG00000237339   | RP11-98L5.2        |
| ENSG00000136315   | RP11-84C10.2       | ENSG00000237361   | TUSC8              |
| ENSG00000137808   | RP11-809H16.2      | ENSG00000237380   | HOXD-AS2           |
| ENSG00000142396   | ERVK3-1            | ENSG00000237399   | PITRM1-AS1         |
| ENSG00000145063   | FLJ33534           | ENSG00000237401   | LINC01304          |
| ENSG00000146666   | LINC00525          | ENSG00000237413   | MGC27382           |
| ENSG00000147753   | TTY7               | ENSG00000237438   | CECR7              |
| ENSG00000147761   | TTY7B              | ENSG00000237461   | RP11-554F20.1      |
| ENSG00000149656   | LINC00266-1        | ENSG00000237463   | RP11-280O1.2       |
| ENSG00000151303   | AGAP11             | ENSG00000237479   | AC007557.2         |
| ENSG00000152931   | PART1              | ENSG00000237484   | AP000476.1         |
| ENSG00000153363   | LINC00467          | ENSG00000237489   | LINC00959          |
| ENSG00000157306   | THTPA              | ENSG00000237499   | RP11-356I2.4       |
| ENSG00000163364   | LINC01116          | ENSG00000237505   | PKN2-AS1           |
| ENSG00000163597   | SNHG16             | ENSG00000237513   | RP11-325F22.2      |
| ENSG00000164621   | SMAD5-AS1          | ENSG00000237517   | DGCR5              |
| ENSG00000166770   | ZNF667-AS1         | ENSG00000237523   | LINC00857          |
| ENSG00000167117   | LINC00483          | ENSG00000237548   | TTLL11-IT1         |
| ENSG00000167355   | OR51B5             | ENSG00000237563   | TTY21B             |
| ENSG00000167459   | LINC00905          | ENSG00000237594   | AP000251.3         |
| ENSG00000167912   | RP11-25K19.1       | ENSG00000237596   | RP13-143G15.4      |
| ENSG00000168367   | LINC00917          | ENSG00000237613   | FAM138A            |
| ENSG00000170161   | GLIDR              | ENSG00000237637   | FRY-AS1            |
| ENSG00000170846   | AC093323.3         | ENSG00000237647   | ERICH1-AS1         |
| ENSG00000170919   | TPT1-AS1           | ENSG00000237654   | AP003025.2         |
| ENSG00000171671   | SHANK2-AS3         | ENSG00000237667   | LINC01115          |
| ENSG00000171889   | MIR31HG            | ENSG00000237675   | TEX36-AS1          |



|                 |               |                 |                |
|-----------------|---------------|-----------------|----------------|
| ENSG00000172250 | SERHL         | ENSG00000237686 | RP5-1120P11.1  |
| ENSG00000172965 | MIR4435-1HG   | ENSG00000237737 | DCTN1-AS1      |
| ENSG00000173867 | RP11-97O12.7  | ENSG00000237742 | RP11-624M8.1   |
| ENSG00000174171 | RP11-23P13.6  | ENSG00000237750 | AC007740.1     |
| ENSG00000174365 | SNHG11        | ENSG00000237753 | FLJ42351       |
| ENSG00000174403 | C20orf166-AS1 | ENSG00000237803 | LINC00211      |
| ENSG00000174680 | GRIK1-AS1     | ENSG00000237807 | RP11-400K9.4   |
| ENSG00000175061 | LRRC75A-AS1   | ENSG00000237836 | PHKA2-AS1      |
| ENSG00000175147 | TMEM51-AS1    | ENSG00000237862 | RP1-63G5.7     |
| ENSG00000175611 | LINC00476     | ENSG00000237870 | AC073130.1     |
| ENSG00000175699 | LINC00521     | ENSG00000237914 | RP11-77C3.3    |
| ENSG00000175701 | LINC00116     | ENSG00000237927 | RP3-393E18.2   |
| ENSG00000175772 | LINC01106     | ENSG00000237928 | NFIA-AS2       |
| ENSG00000175773 | RP11-121M22.1 | ENSG00000237940 | AC093642.3     |
| ENSG00000175873 | AC004840.9    | ENSG00000237941 | KCNQ1DN        |
| ENSG00000175967 | FLJ34503      | ENSG00000237945 | LINC00649      |
| ENSG00000176320 | RP11-404O13.5 | ENSG00000237954 | RP11-14O19.2   |
| ENSG00000176515 | RP5-856G1.2   | ENSG00000237975 | FLG-AS1        |
| ENSG00000176728 | TTY14         | ENSG00000237978 | RP11-385J1.2   |
| ENSG00000176754 | LINC00303     | ENSG00000237986 | CELF2-AS2      |
| ENSG00000176840 | MIR7-3HG      | ENSG00000238005 | RP11-443B7.1   |
| ENSG00000177112 | MRV11-AS1     | ENSG00000238035 | AC138035.2     |
| ENSG00000177133 | LINC00982     | ENSG00000238039 | AF011889.2     |
| ENSG00000177337 | DLGAP1-AS1    | ENSG00000238045 | AC009133.12    |
| ENSG00000177338 | LINC00469     | ENSG00000238062 | SPATA3-AS1     |
| ENSG00000177340 | FLJ13224      | ENSG00000238078 | LINC01352      |
| ENSG00000177369 | FLJ40194      | ENSG00000238099 | RP11-12A2.3    |
| ENSG00000177406 | RP11-218M22.1 | ENSG00000238113 | LINC01410      |
| ENSG00000177410 | ZFAS1         | ENSG00000238120 | CTA-941F9.9    |
| ENSG00000177596 | RP11-512C24.3 | ENSG00000238121 | LINC00426      |
| ENSG00000177640 | CASC2         | ENSG00000238122 | RP11-483I13.2  |
| ENSG00000177738 | CTD-2201E18.3 | ENSG00000238133 | MLK7-AS1       |
| ENSG00000177822 | MGC45800      | ENSG00000238164 | RP3-395M20.8   |
| ENSG00000178193 | RP4-682C21.5  | ENSG00000238184 | CD81-AS1       |
| ENSG00000178248 | AP000345.1    | ENSG00000238197 | PAXBP1-AS1     |
| ENSG00000178457 | LINC00314     | ENSG00000238198 | RP11-31F15.2   |
| ENSG00000178803 | ADORA2A-AS1   | ENSG00000238217 | AC093590.1     |
| ENSG00000178947 | LINC00086     | ENSG00000238266 | LINC00707      |
| ENSG00000178977 | LINC00324     | ENSG00000238268 | RP11-229P13.19 |
| ENSG00000179082 | C9orf106      | ENSG00000238755 | RP11-23D24.2   |
| ENSG00000179136 | LINC00670     | ENSG00000239219 | RP11-379K17.4  |
| ENSG00000179141 | MTUS2-AS1     | ENSG00000239225 | TTY23          |
| ENSG00000179406 | LINC00174     | ENSG00000239265 | CLRN1-AS1      |
| ENSG00000179447 | RP5-1027G4.3  | ENSG00000239440 | RP11-260O18.1  |

|                 |               |                 |               |
|-----------------|---------------|-----------------|---------------|
| ENSG00000179676 | LINC00305     | ENSG00000239482 | RP11-90K6.1   |
| ENSG00000179743 | FLJ37453      | ENSG00000239513 | LINC01210     |
| ENSG00000179818 | PCBP1-AS1     | ENSG00000239523 | MYLK-AS1      |
| ENSG00000179935 | LINC00652     | ENSG00000239533 | GOLGA2P2Y     |
| ENSG00000180139 | ACTA2-AS1     | ENSG00000239589 | LINC00879     |
| ENSG00000180279 | MGC45922      | ENSG00000239653 | PSMD6-AS2     |
| ENSG00000180422 | LINC00304     | ENSG00000239791 | AC002310.7    |
| ENSG00000180712 | RP11-290F5.2  | ENSG00000239877 | IGSF11-AS1    |
| ENSG00000180769 | WDFY3-AS2     | ENSG00000239911 | PRKAG2-AS1    |
| ENSG00000180846 | CSNK1G2-AS1   | ENSG00000239920 | AC015691.13   |
| ENSG00000180910 | TTY11         | ENSG00000239921 | RP11-59J16.1  |
| ENSG00000181171 | FER1L6-AS1    | ENSG00000239922 | RP11-71N10.1  |
| ENSG00000181211 | HECW1-IT1     | ENSG00000240040 | AC096579.13   |
| ENSG00000181798 | LINC00471     | ENSG00000240045 | RP11-451G4.2  |
| ENSG00000181995 | LINC00301     | ENSG00000240050 | RP1-93H18.1   |
| ENSG00000182021 | RP11-381O7.3  | ENSG00000240207 | RP11-379F4.4  |
| ENSG00000182057 | OGFRP1        | ENSG00000240291 | RP11-499P20.2 |
| ENSG00000182109 | PPIEL         | ENSG00000240405 | LINC01212     |
| ENSG00000182165 | TP53TG1       | ENSG00000240423 | LINC00636     |
| ENSG00000182310 | SPACA6P       | ENSG00000240450 | CSPG4P1Y      |
| ENSG00000182366 | FAM87A        | ENSG00000240498 | CDKN2B-AS1    |
| ENSG00000182376 | RP5-1142A6.8  | ENSG00000240707 | LINC01168     |
| ENSG00000182586 | LINC00334     | ENSG00000240710 | RP11-430C7.4  |
| ENSG00000182824 | AC008132.15   | ENSG00000240770 | C21orf91-OT1  |
| ENSG00000182873 | RP11-181G12.2 | ENSG00000240859 | AC093627.10   |
| ENSG00000183385 | TTY8          | ENSG00000240875 | LINC00886     |
| ENSG00000183535 | COL18A1-AS1   | ENSG00000240889 | NDUFB2-AS1    |
| ENSG00000183674 | LINC00518     | ENSG00000240973 | RP11-458K10.2 |
| ENSG00000184115 | RP13-1039J1.2 | ENSG00000240990 | HOXA11-AS     |
| ENSG00000184856 | LINC00308     | ENSG00000240996 | FLJ37201      |
| ENSG00000184906 | AC129778.2    | ENSG00000241158 | ADAMTS9-AS1   |
| ENSG00000184991 | TTY13         | ENSG00000241163 | LINC00877     |
| ENSG00000185065 | AC000068.5    | ENSG00000241168 | RP11-10022.1  |
| ENSG00000185168 | LINC00482     | ENSG00000241219 | RP11-572M11.1 |
| ENSG00000185186 | LINC00313     | ENSG00000241224 | FLJ22763      |
| ENSG00000185433 | LINC00158     | ENSG00000241280 | RP11-221J22.2 |
| ENSG00000185700 | TTY8B         | ENSG00000241313 | WWTR1-AS1     |
| ENSG00000185847 | LINC01405     | ENSG00000241316 | SUCLG2-AS1    |
| ENSG00000185904 | LINC00839     | ENSG00000241324 | RP5-921G16.2  |
| ENSG00000186019 | AC084219.4    | ENSG00000241336 | RP11-451G4.1  |
| ENSG00000186056 | MATN1-AS1     | ENSG00000241345 | RP4-630C24.3  |
| ENSG00000186148 | AC013271.3    | ENSG00000241369 | LINC01192     |
| ENSG00000186369 | LINC00643     | ENSG00000241469 | LINC00635     |
| ENSG00000186594 | MIR22HG       | ENSG00000241472 | PTPRG-AS1     |

|                 |               |                 |               |
|-----------------|---------------|-----------------|---------------|
| ENSG00000186615 | KTN1-AS1      | ENSG00000241490 | RP11-553L6.2  |
| ENSG00000187012 | LINC00207     | ENSG00000241560 | ZBTB20-AS1    |
| ENSG00000187185 | CTD-2600O9.1  | ENSG00000241684 | ADAMTS9-AS2   |
| ENSG00000187621 | TCL6          | ENSG00000241769 | LINC00893     |
| ENSG00000187979 | AC008079.9    | ENSG00000241956 | CTC-340A15.2  |
| ENSG00000188185 | LINC00265     | ENSG00000241990 | RP6-109B7.3   |
| ENSG00000188206 | HNRNPU-AS1    | ENSG00000242048 | RP13-452N2.1  |
| ENSG00000188525 | AC010969.1    | ENSG00000242049 | DNAJB8-AS1    |
| ENSG00000188660 | LINC00319     | ENSG00000242086 | LINC00969     |
| ENSG00000188693 | CYP51A1-AS1   | ENSG00000242094 | FOXP1-IT1     |
| ENSG00000188825 | LINC00910     | ENSG00000242125 | SNHG3         |
| ENSG00000189149 | CRYM-AS1      | ENSG00000242258 | LINC00996     |
| ENSG00000189223 | PAX8-AS1      | ENSG00000242282 | AC108488.4    |
| ENSG00000189229 | AC069277.2    | ENSG00000242288 | RP11-464F9.1  |
| ENSG00000189238 | LINC00943     | ENSG00000242349 | NPPA-AS1      |
| ENSG00000189419 | SPATA41       | ENSG00000242375 | RP11-498P14.3 |
| ENSG00000196167 | COLCA1        | ENSG00000242385 | LINC00901     |
| ENSG00000196273 | LINC00523     | ENSG00000242428 | C3orf67-AS1   |
| ENSG00000196295 | AC005154.6    | ENSG00000242512 | LINC01206     |
| ENSG00000196421 | LINC00176     | ENSG00000242516 | LINC00960     |
| ENSG00000196553 | LINC00238     | ENSG00000242593 | RP5-921G16.1  |
| ENSG00000196668 | LINC00173     | ENSG00000242622 | RP11-18H7.1   |
| ENSG00000196696 | PDXDC2P       | ENSG00000242641 | LINC00971     |
| ENSG00000196756 | SNHG17        | ENSG00000242686 | RP11-1191J2.2 |
| ENSG00000196810 | CTBP1-AS2     | ENSG00000242687 | AC004893.11   |
| ENSG00000196893 | AC090286.4    | ENSG00000242753 | RP11-716O23.2 |
| ENSG00000196951 | SCOC-AS1      | ENSG00000242759 | LINC00882     |
| ENSG00000196979 | RP11-88G17.6  | ENSG00000242808 | SOX2-OT       |
| ENSG00000197085 | NPSR1-AS1     | ENSG00000243008 | RP11-556N21.1 |
| ENSG00000197176 | RP11-76E12.1  | ENSG00000243069 | ARHGEF26-AS1  |
| ENSG00000197210 | KB-1592A4.15  | ENSG00000243083 | LINC00870     |
| ENSG00000197251 | LINC00336     | ENSG00000243150 | RP11-538P18.2 |
| ENSG00000197291 | RAMP2-AS1     | ENSG00000243179 | AC110769.3    |
| ENSG00000197332 | ZNF833P       | ENSG00000243197 | TUSC7         |
| ENSG00000197503 | LINC00477     | ENSG00000243276 | RP11-384F7.1  |
| ENSG00000197558 | SSPO          | ENSG00000243319 | FGF14-IT1     |
| ENSG00000197813 | CTC-301O7.4   | ENSG00000243349 | RP11-445N18.7 |
| ENSG00000197989 | SNHG12        | ENSG00000243593 | RP11-500K19.1 |
| ENSG00000198106 | SNX29P2       | ENSG00000243629 | LINC00880     |
| ENSG00000198547 | C2orf203      | ENSG00000243637 | AC019221.4    |
| ENSG00000198788 | MUC2          | ENSG00000243701 | LINC00883     |
| ENSG00000203279 | RP11-498P14.5 | ENSG00000243715 | CACNA2D3-AS1  |
| ENSG00000203280 | CTA-221G9.11  | ENSG00000243766 | HOTTIP        |
| ENSG00000203288 | RP11-98D18.9  | ENSG00000243797 | CTB-111H14.1  |

|                 |               |                 |                |
|-----------------|---------------|-----------------|----------------|
| ENSG00000203321 | RP11-197P3.4  | ENSG00000243818 | RP11-372E1.4   |
| ENSG00000203335 | AC006019.3    | ENSG00000243836 | WDR86-AS1      |
| ENSG00000203499 | FAM83H-AS1    | ENSG00000244040 | IL12A-AS1      |
| ENSG00000203527 | Z99756.1      | ENSG00000244041 | LINC01011      |
| ENSG00000203585 | RP11-542B15.1 | ENSG00000244151 | RP11-148K1.1.2 |
| ENSG00000203650 | LINC01285     | ENSG00000244203 | FOXP1-AS1      |
| ENSG00000203688 | RP11-351J23.1 | ENSG00000244215 | RP11-88I21.2   |
| ENSG00000203709 | C1orf132      | ENSG00000244227 | LINC01330      |
| ENSG00000203721 | LINC00862     | ENSG00000244231 | CSPG4P2Y       |
| ENSG00000203729 | LINC00272     | ENSG00000244300 | RP11-475N22.4  |
| ENSG00000203739 | RP11-296O14.3 | ENSG00000244342 | LINC00698      |
| ENSG00000203801 | LINC00222     | ENSG00000244471 | RP11-78J21.4   |
| ENSG00000203808 | BVES-AS1      | ENSG00000244479 | OR2A1-AS1      |
| ENSG00000203865 | ATP1A1-AS1    | ENSG00000244578 | LINC01391      |
| ENSG00000203875 | SNHG5         | ENSG00000244675 | AC108676.1     |
| ENSG00000203897 | SPATA42       | ENSG00000244926 | ALKBH3-AS1     |
| ENSG00000203930 | LINC00632     | ENSG00000244953 | RP11-613D13.8  |
| ENSG00000203987 | RP11-188C12.3 | ENSG00000244968 | LIFR-AS1       |
| ENSG00000203999 | LINC01270     | ENSG00000245025 | RP11-875O11.1  |
| ENSG00000204025 | TRPC5OS       | ENSG00000245060 | LINC00847      |
| ENSG00000204049 | RP11-126H7.4  | ENSG00000245067 | IGFBP7-AS1     |
| ENSG00000204054 | LINC00963     | ENSG00000245080 | RP11-320N21.1  |
| ENSG00000204055 | RP11-247A12.2 | ENSG00000245105 | A2M-AS1        |
| ENSG00000204148 | LINC00474     | ENSG00000245112 | SMARCA5-AS1    |
| ENSG00000204241 | RP11-713P17.3 | ENSG00000245146 | LINC01024      |
| ENSG00000204272 | LINC01420     | ENSG00000245156 | RP11-867G23.3  |
| ENSG00000204282 | TNRC6C-AS1    | ENSG00000245164 | LINC00861      |
| ENSG00000204380 | AC005042.4    | ENSG00000245213 | RP11-10K16.1   |
| ENSG00000204460 | AC079586.1    | ENSG00000245248 | USP2-AS1       |
| ENSG00000204528 | PSORS1C3      | ENSG00000245275 | SAP30L-AS1     |
| ENSG00000204581 | AC096670.3    | ENSG00000245281 | CTD-2547L16.1  |
| ENSG00000204588 | LINC01123     | ENSG00000245293 | RP11-286E11.1  |
| ENSG00000204603 | LINC01257     | ENSG00000245311 | ARNTL2-AS1     |
| ENSG00000204623 | ZNRD1-AS1     | ENSG00000245384 | AC004053.1     |
| ENSG00000204625 | HCG9          | ENSG00000245466 | CTD-2540L5.6   |
| ENSG00000204666 | FLJ26850      | ENSG00000245479 | RP11-387D10.3  |
| ENSG00000204684 | RP5-1004I9.1  | ENSG00000245498 | RP11-677M14.7  |
| ENSG00000204685 | STARD7-AS1    | ENSG00000245522 | RP11-540A21.2  |
| ENSG00000204706 | MAMDC2-AS1    | ENSG00000245526 | LINC00461      |
| ENSG00000204758 | CTC-308K20.1  | ENSG00000245534 | RP11-219B17.1  |
| ENSG00000204792 | LINC01291     | ENSG00000245552 | RP11-712B9.2   |
| ENSG00000204832 | ST8SIA6-AS1   | ENSG00000245571 | AP001258.4     |
| ENSG00000204850 | CTB-158D10.3  | ENSG00000245573 | BDNF-AS        |
| ENSG00000204860 | FAM201A       | ENSG00000245598 | DACT3-AS1      |

|                 |               |                 |                |
|-----------------|---------------|-----------------|----------------|
| ENSG00000204929 | AC074391.1    | ENSG00000245614 | DDX11-AS1      |
| ENSG00000204934 | ATP6V0E2-AS1  | ENSG00000245648 | RP11-277P12.20 |
| ENSG00000204949 | FAM83A-AS1    | ENSG00000245685 | AF146191.4     |
| ENSG00000205037 | RP11-863P13.4 | ENSG00000245694 | CRNDE          |
| ENSG00000205054 | LINC01121     | ENSG00000245729 | RP11-480D4.1   |
| ENSG00000205231 | TTLL10-AS1    | ENSG00000245750 | RP11-279F6.1   |
| ENSG00000205266 | AL353997.3    | ENSG00000245812 | RP11-175K6.1   |
| ENSG00000205396 | LINC00661     | ENSG00000245832 | RP11-179A16.1  |
| ENSG00000205424 | AL592528.1    | ENSG00000245870 | LINC00682      |
| ENSG00000205488 | CALML3-AS1    | ENSG00000245904 | RP11-796E2.4   |
| ENSG00000205500 | AC013472.3    | ENSG00000245910 | SNHG6          |
| ENSG00000205559 | CHKB-AS1      | ENSG00000245937 | LINC01184      |
| ENSG00000205562 | RP11-497E19.1 | ENSG00000245954 | RP11-18H21.1   |
| ENSG00000205632 | LINC01310     | ENSG00000246022 | ALDH1L1-AS2    |
| ENSG00000205634 | LINC00898     | ENSG00000246067 | RAB30-AS1      |
| ENSG00000205663 | RP11-706O15.5 | ENSG00000246084 | CTD-2506J14.1  |
| ENSG00000205786 | AC002511.1    | ENSG00000246089 | RP11-115C21.2  |
| ENSG00000205791 | LOH12CR2      | ENSG00000246090 | RP11-696N14.1  |
| ENSG00000205837 | LINC00487     | ENSG00000246100 | LINC00900      |
| ENSG00000205861 | C1QTNF9B-AS1  | ENSG00000246130 | RP11-875O11.2  |
| ENSG00000205865 | FAM99B        | ENSG00000246211 | RP11-632K5.3   |
| ENSG00000205866 | FAM99A        | ENSG00000246225 | RP11-17A1.3    |
| ENSG00000205885 | C1RL-AS1      | ENSG00000246228 | CASC8          |
| ENSG00000205913 | SRRM2-AS1     | ENSG00000246250 | RP11-613D13.5  |
| ENSG00000205930 | C21orf49      | ENSG00000246263 | KB-431C1.4     |
| ENSG00000206028 | CTA-373H7.7   | ENSG00000246273 | SBF2-AS1       |
| ENSG00000206113 | RP11-503N18.1 | ENSG00000246316 | RP11-492A10.1  |
| ENSG00000206140 | TMEM191C      | ENSG00000246334 | PRR7-AS1       |
| ENSG00000206195 | AP000525.9    | ENSG00000246339 | EXTL3-AS1      |
| ENSG00000206417 | H1FX-AS1      | ENSG00000246350 | RP5-1186N24.3  |
| ENSG00000206567 | AC022007.5    | ENSG00000246363 | RP11-13A1.1    |
| ENSG00000207955 | MIR219A2      | ENSG00000246375 | RP11-10L7.1    |
| ENSG00000212163 | SNORD91A      | ENSG00000246379 | RP11-461O7.1   |
| ENSG00000212694 | LINC01089     | ENSG00000246422 | CTD-2024I7.13  |
| ENSG00000212766 | LINC00277     | ENSG00000246430 | LINC00968      |
| ENSG00000212855 | TTY2          | ENSG00000246451 | RP11-894P9.1   |
| ENSG00000212856 | TTY2B         | ENSG00000246465 | RP11-57A19.2   |
| ENSG00000212978 | AC016747.3    | ENSG00000246477 | AF131216.6     |
| ENSG00000213057 | C1orf220      | ENSG00000246523 | RP11-736K20.6  |
| ENSG00000213373 | LINC00671     | ENSG00000246582 | RP11-1149O23.3 |
| ENSG00000213468 | FIRRE         | ENSG00000246627 | CACNA1C-AS1    |
| ENSG00000213742 | ZNF337-AS1    | ENSG00000246695 | RASSF8-AS1     |
| ENSG00000213904 | LIPE-AS1      | ENSG00000246731 | MGC16275       |
| ENSG00000213963 | AC074286.1    | ENSG00000246763 | RGMB-AS1       |

|                 |               |                 |               |
|-----------------|---------------|-----------------|---------------|
| ENSG00000213971 | RP11-15H20.6  | ENSG00000246790 | RP11-730K11.1 |
| ENSG00000213981 | AC007277.3    | ENSG00000246792 | RP11-68L18.1  |
| ENSG00000214039 | RP11-474D1.3  | ENSG00000246876 | RP11-519M16.1 |
| ENSG00000214043 | RP5-944M2.3   | ENSG00000246877 | DNM1P35       |
| ENSG00000214049 | UCA1          | ENSG00000246889 | AP000487.5    |
| ENSG00000214145 | LINC00887     | ENSG00000246898 | LINC00920     |
| ENSG00000214184 | AC012487.2    | ENSG00000246982 | RP1-179N16.6  |
| ENSG00000214347 | CTB-180A7.8   | ENSG00000246985 | SOCS2-AS1     |
| ENSG00000214353 | VAC14-AS1     | ENSG00000247049 | CTC-338M12.7  |
| ENSG00000214381 | LINC00488     | ENSG00000247081 | BAALC-AS1     |
| ENSG00000214407 | RP11-221J22.1 | ENSG00000247095 | MIR210HG      |
| ENSG00000214432 | AC068831.10   | ENSG00000247131 | RP11-588G21.2 |
| ENSG00000214548 | MEG3          | ENSG00000247134 | RP11-11N9.4   |
| ENSG00000214691 | AC104654.1    | ENSG00000247151 | CSTF3-AS1     |
| ENSG00000214719 | AC005562.1    | ENSG00000247157 | LINC01252     |
| ENSG00000214725 | CDIPT-AS1     | ENSG00000247193 | RP11-431M7.3  |
| ENSG00000214783 | POLR2J4       | ENSG00000247199 | RP11-373N22.3 |
| ENSG00000214837 | LINC01347     | ENSG00000247228 | RP11-296I10.3 |
| ENSG00000214870 | AC004540.5    | ENSG00000247240 | UBL7-AS1      |
| ENSG00000214894 | LINC00243     | ENSG00000247271 | ZBED5-AS1     |
| ENSG00000214922 | HLA-F-AS1     | ENSG00000247287 | RP11-902B17.1 |
| ENSG00000214970 | CTC-297N7.7   | ENSG00000247317 | RP11-273G15.2 |
| ENSG00000215022 | RP1-257A7.4   | ENSG00000247324 | RP11-510M2.2  |
| ENSG00000215039 | CD27-AS1      | ENSG00000247363 | RP11-637A17.2 |
| ENSG00000215068 | AC025171.1    | ENSG00000247381 | PDX1-AS1      |
| ENSG00000215117 | LINC00588     | ENSG00000247400 | DNAJC3-AS1    |
| ENSG00000215162 | LINC00269     | ENSG00000247416 | RP11-629G13.1 |
| ENSG00000215190 | LINC00680     | ENSG00000247473 | CARS-AS1      |
| ENSG00000215196 | AC091878.1    | ENSG00000247498 | RP11-392P7.6  |
| ENSG00000215231 | LINC01020     | ENSG00000247516 | MIR4458HG     |
| ENSG00000215246 | RP11-43F13.3  | ENSG00000247556 | OIP5-AS1      |
| ENSG00000215256 | DHRS4-AS1     | ENSG00000247572 | CKMT2-AS1     |
| ENSG00000215304 | RP13-395E19.3 | ENSG00000247595 | SPTY2D1-AS1   |
| ENSG00000215374 | FAM66B        | ENSG00000247624 | CPEB2-AS1     |
| ENSG00000215386 | LINC00478     | ENSG00000247675 | LRP4-AS1      |
| ENSG00000215417 | MIR17HG       | ENSG00000247699 | CTB-127C13.1  |
| ENSG00000215424 | MCM3AP-AS1    | ENSG00000247708 | STX18-AS1     |
| ENSG00000215447 | BX322557.10   | ENSG00000247774 | PCED1B-AS1    |
| ENSG00000215458 | AP001053.11   | ENSG00000247775 | SNCA-AS1      |
| ENSG00000215483 | LINC00598     | ENSG00000247796 | CTD-2366F13.1 |
| ENSG00000215498 | FAM230B       | ENSG00000247809 | NR2F2-AS1     |
| ENSG00000215533 | LINC00189     | ENSG00000247828 | TMEM161B-AS1  |
| ENSG00000215560 | TTY5          | ENSG00000247844 | CCAT1         |
| ENSG00000215765 | CTB-61M7.1    | ENSG00000247853 | RP5-940J5.6   |

|                 |               |                 |               |
|-----------------|---------------|-----------------|---------------|
| ENSG00000215769 | MIR6080       | ENSG00000247867 | CTD-2530H12.1 |
| ENSG00000215859 | PDZK1P2       | ENSG00000247877 | CTD-2001C12.1 |
| ENSG00000215866 | LINC01356     | ENSG00000247950 | SEC24B-AS1    |
| ENSG00000215908 | CROCCP2       | ENSG00000247982 | LINC00926     |
| ENSG00000216863 | LY86-AS1      | ENSG00000248015 | AC005329.7    |
| ENSG00000217576 | RP11-248G5.8  | ENSG00000248019 | FAM13A-AS1    |
| ENSG00000218109 | KIRREL3-AS3   | ENSG00000248027 | CTD-2383M3.1  |
| ENSG00000218839 | FAM138C       | ENSG00000248049 | UBA6-AS1      |
| ENSG00000219445 | RP11-3B12.3   | ENSG00000248079 | DPH6-AS1      |
| ENSG00000219665 | CTD-2006C1.2  | ENSG00000248092 | NNT-AS1       |
| ENSG00000219926 | RP11-394A14.2 | ENSG00000248101 | AC002116.8    |
| ENSG00000220161 | FLJ35934      | ENSG00000248115 | RP11-752D24.2 |
| ENSG00000221857 | CTD-2527I21.4 | ENSG00000248118 | LINC01019     |
| ENSG00000222041 | LINC00152     | ENSG00000248131 | LINC01194     |
| ENSG00000223358 | EHHADH-AS1    | ENSG00000248174 | RP11-148L24.1 |
| ENSG00000223387 | RP11-408H1.3  | ENSG00000248187 | RP11-184M15.1 |
| ENSG00000223393 | RP5-858B6.3   | ENSG00000248197 | LINC00290     |
| ENSG00000223396 | RPS10P7       | ENSG00000248222 | CTB-174D11.1  |
| ENSG00000223403 | MEG9          | ENSG00000248223 | CTD-2139B15.2 |
| ENSG00000223414 | LINC00473     | ENSG00000248228 | SLIT2-IT1     |
| ENSG00000223440 | RP11-555J4.4  | ENSG00000248265 | FLJ12825      |
| ENSG00000223482 | NUTM2A-AS1    | ENSG00000248275 | TRIM52-AS1    |
| ENSG00000223486 | AC092198.1    | ENSG00000248279 | CTD-2218G20.2 |
| ENSG00000223522 | AC093690.1    | ENSG00000248307 | LINC00616     |
| ENSG00000223546 | LINC00630     | ENSG00000248309 | MEF2C-AS1     |
| ENSG00000223561 | AC003090.1    | ENSG00000248318 | RP11-713M15.1 |
| ENSG00000223573 | TINCR         | ENSG00000248319 | RP11-205M3.3  |
| ENSG00000223586 | LINC01312     | ENSG00000248323 | LUCAT1        |
| ENSG00000223631 | LINC01120     | ENSG00000248332 | RP11-236J17.5 |
| ENSG00000223641 | TTY17C        | ENSG00000248360 | LINC00504     |
| ENSG00000223653 | RP11-131L23.1 | ENSG00000248416 | RP11-1191J2.4 |
| ENSG00000223701 | RAET1E-AS1    | ENSG00000248429 | RP11-597D13.9 |
| ENSG00000223745 | RP4-717I23.3  | ENSG00000248441 | LINC01197     |
| ENSG00000223749 | MIR503HG      | ENSG00000248458 | RP4-598P13.1  |
| ENSG00000223764 | RP11-54O7.3   | ENSG00000248476 | BACH1-IT1     |
| ENSG00000223770 | MIR1255B1     | ENSG00000248492 | ZFAT-AS1      |
| ENSG00000223786 | RP11-554D15.1 | ENSG00000248505 | RP11-319E12.1 |
| ENSG00000223797 | ENTPD3-AS1    | ENSG00000248508 | SRP14-AS1     |
| ENSG00000223799 | IL10RB-AS1    | ENSG00000248510 | RP11-145G20.1 |
| ENSG00000223806 | LINC00114     | ENSG00000248516 | RP11-265O12.1 |
| ENSG00000223813 | AC007255.8    | ENSG00000248529 | RP11-2O17.2   |
| ENSG00000223823 | LINC01342     | ENSG00000248538 | RP11-10A14.5  |
| ENSG00000223839 | FAM95B1       | ENSG00000248550 | OTX2-AS1      |
| ENSG00000223891 | OSER1-AS1     | ENSG00000248571 | RP11-768B22.2 |

|                 |                 |                 |               |
|-----------------|-----------------|-----------------|---------------|
| ENSG00000223907 | LINC01226       | ENSG00000248596 | RP11-844P9.2  |
| ENSG00000223910 | ZNF32-AS3       | ENSG00000248636 | RP11-768F21.1 |
| ENSG00000223930 | RP11-33A14.1    | ENSG00000248663 | LINC00992     |
| ENSG00000223949 | ROR1-AS1        | ENSG00000248671 | ALG1L9P       |
| ENSG00000223960 | AC009948.5      | ENSG00000248690 | HAS2-AS1      |
| ENSG00000223991 | AC104809.2      | ENSG00000248698 | LINC01085     |
| ENSG00000224023 | FLJ37035        | ENSG00000248703 | RP11-495K9.3  |
| ENSG00000224032 | EPB41L4A-AS1    | ENSG00000248724 | NPHP3-AS1     |
| ENSG00000224043 | CCNT2-AS1       | ENSG00000248738 | RP11-87E22.2  |
| ENSG00000224057 | EGFR-AS1        | ENSG00000248771 | LINC01207     |
| ENSG00000224074 | LINC00691       | ENSG00000248809 | LINC01095     |
| ENSG00000224075 | TTY2            | ENSG00000248810 | RP11-362F19.1 |
| ENSG00000224078 | SNHG14          | ENSG00000248837 | RP11-412P11.1 |
| ENSG00000224081 | LINC01057       | ENSG00000248858 | FLJ46284      |
| ENSG00000224086 | LL22NC03-86G7.1 | ENSG00000248872 | RP11-344G13.1 |
| ENSG00000224093 | RP5-1033H22.2   | ENSG00000248890 | HHIP-AS1      |
| ENSG00000224107 | LINC00633       | ENSG00000248893 | FAM138E       |
| ENSG00000224116 | INHBA-AS1       | ENSG00000248896 | CTD-2135J3.3  |
| ENSG00000224141 | AL109763.2      | ENSG00000249035 | CTB-113P19.1  |
| ENSG00000224149 | RP11-510C10.3   | ENSG00000249054 | FAM138D       |
| ENSG00000224152 | AC009506.1      | ENSG00000249061 | RP11-72L22.1  |
| ENSG00000224165 | DNAJC27-AS1     | ENSG00000249096 | RP11-290F5.1  |
| ENSG00000224184 | AC096559.1      | ENSG00000249106 | RP11-806K15.1 |
| ENSG00000224187 | RP11-132N15.3   | ENSG00000249159 | RP11-480D4.2  |
| ENSG00000224189 | HAGLR           | ENSG00000249163 | CTD-3028N15.1 |
| ENSG00000224209 | LINC00466       | ENSG00000249173 | LINC01093     |
| ENSG00000224216 | RP13-228J13.1   | ENSG00000249175 | CTC-484P3.3   |
| ENSG00000224271 | RP11-191L9.4    | ENSG00000249196 | RP11-669N7.2  |
| ENSG00000224272 | AC114730.3      | ENSG00000249201 | CTD-3080P12.3 |
| ENSG00000224281 | SLC25A5-AS1     | ENSG00000249231 | CASC16        |
| ENSG00000224286 | LINC01142       | ENSG00000249267 | LINC00939     |
| ENSG00000224294 | RP3-326I13.1    | ENSG00000249307 | LINC01088     |
| ENSG00000224310 | AC012317.1      | ENSG00000249328 | RP11-26J3.1   |
| ENSG00000224358 | RP11-466F5.8    | ENSG00000249343 | LINC01333     |
| ENSG00000224382 | LINC00703       | ENSG00000249345 | RP11-575F12.1 |
| ENSG00000224397 | LINC01272       | ENSG00000249346 | LINC01016     |
| ENSG00000224406 | RP11-48F14.1    | ENSG00000249348 | UGDH-AS1      |
| ENSG00000224413 | AP001476.2      | ENSG00000249352 | RP11-141O11.2 |
| ENSG00000224424 | PRKAR2A-AS1     | ENSG00000249364 | RP11-434D9.1  |
| ENSG00000224481 | RP11-495P10.3   | ENSG00000249375 | CASC11        |
| ENSG00000224490 | TTC21B-AS1      | ENSG00000249378 | LINC01060     |
| ENSG00000224511 | LINC00365       | ENSG00000249395 | CASC9         |
| ENSG00000224514 | LINC00620       | ENSG00000249419 | RP11-497K21.1 |
| ENSG00000224533 | TMLHE-AS1       | ENSG00000249464 | LINC01091     |



|                 |               |                 |                 |
|-----------------|---------------|-----------------|-----------------|
| ENSG00000224577 | LINC01117     | ENSG00000249484 | AC091969.1      |
| ENSG00000224582 | LINC01015     | ENSG00000249487 | RP11-97O12.2    |
| ENSG00000224596 | ZMIZ1-AS1     | ENSG00000249494 | CTB-161M19.4    |
| ENSG00000224597 | PTCHD3P1      | ENSG00000249497 | RP11-1079K10.5  |
| ENSG00000224609 | HSD52         | ENSG00000249550 | LINC01234       |
| ENSG00000224614 | TNK2-AS1      | ENSG00000249568 | RP11-234O6.2    |
| ENSG00000224635 | RP4-564F22.5  | ENSG00000249574 | AC226118.1      |
| ENSG00000224652 | LINC00885     | ENSG00000249601 | LINC01187       |
| ENSG00000224660 | SH3BP5-AS1    | ENSG00000249618 | RP11-422J15.1   |
| ENSG00000224675 | AC009227.2    | ENSG00000249647 | C5orf66-AS2     |
| ENSG00000224687 | RASAL2-AS1    | ENSG00000249669 | MIR143HG        |
| ENSG00000224698 | RP11-131J3.1  | ENSG00000249673 | NOP14-AS1       |
| ENSG00000224711 | RP5-988G17.1  | ENSG00000249690 | RP11-1336O20.2  |
| ENSG00000224713 | AC025165.8    | ENSG00000249695 | RP11-598F7.4    |
| ENSG00000224717 | RP11-576D8.4  | ENSG00000249700 | SRD5A3-AS1      |
| ENSG00000224729 | PCOLCE-AS1    | ENSG00000249717 | RP11-44F21.3    |
| ENSG00000224738 | AC099850.1    | ENSG00000249738 | AC008697.1      |
| ENSG00000224743 | TEX26-AS1     | ENSG00000249781 | CTD-2143L24.1   |
| ENSG00000224750 | RP11-94M14.2  | ENSG00000249816 | LINC00964       |
| ENSG00000224761 | RP11-508N22.8 | ENSG00000249825 | CTD-2201I18.1   |
| ENSG00000224788 | RP5-933E2.1   | ENSG00000249833 | CCDC37-AS1      |
| ENSG00000224812 | TMEM72-AS1    | ENSG00000249859 | PVT1            |
| ENSG00000224843 | LINC00240     | ENSG00000249873 | RP11-983C2.2    |
| ENSG00000224885 | TSSC1-IT1     | ENSG00000249896 | RP11-586D19.1   |
| ENSG00000224888 | RP5-1142A6.2  | ENSG00000249898 | CTD-2541M15.1   |
| ENSG00000224897 | POT1-AS1      | ENSG00000249923 | XXbac-B444P24.8 |
| ENSG00000224905 | AP001347.6    | ENSG00000249937 | RP11-454P21.1   |
| ENSG00000224914 | LINC00863     | ENSG00000249993 | BFSP2-AS1       |
| ENSG00000224924 | LINC00320     | ENSG00000250007 | RP11-814P5.1    |
| ENSG00000224944 | CASC6         | ENSG00000250033 | SLC7A11-AS1     |
| ENSG00000224950 | RP5-1086K13.1 | ENSG00000250049 | RP11-348J24.2   |
| ENSG00000224957 | LINC01266     | ENSG00000250056 | LINC01018       |
| ENSG00000224973 | LARGE-AS1     | ENSG00000250062 | RP11-778J15.1   |
| ENSG00000224989 | FAM41AY1      | ENSG00000250072 | CTC-529P8.1     |
| ENSG00000225032 | RP11-228B15.4 | ENSG00000250075 | RP11-584P21.2   |
| ENSG00000225062 | CATIP-AS1     | ENSG00000250107 | CACNA1G-AS1     |
| ENSG00000225135 | RP11-361F15.2 | ENSG00000250131 | RP11-130F10.1   |
| ENSG00000225177 | FLJ46906      | ENSG00000250150 | RP11-436A7.1    |
| ENSG00000225180 | AATK-AS1      | ENSG00000250198 | RP11-143A12.3   |
| ENSG00000225206 | MIR137HG      | ENSG00000250208 | FZD10-AS1       |
| ENSG00000225231 | AC091814.2    | ENSG00000250230 | RP11-855O10.2   |
| ENSG00000225269 | LINC00705     | ENSG00000250241 | RP11-9G1.3      |
| ENSG00000225298 | LINC00113     | ENSG00000250295 | RP11-434I12.2   |
| ENSG00000225302 | RP11-539I5.1  | ENSG00000250303 | RP11-356J5.12   |

|                 |                      |                 |               |
|-----------------|----------------------|-----------------|---------------|
| ENSG00000225329 | RP11-325F22.5        | ENSG00000250328 | MGC32805      |
| ENSG00000225361 | PPP1R26-AS1          | ENSG00000250334 | LINC00989     |
| ENSG00000225383 | SFTA1P               | ENSG00000250337 | LINC01021     |
| ENSG00000225391 | NHEG1                | ENSG00000250341 | RP11-785F11.1 |
| ENSG00000225393 | RP11-218L14.4        | ENSG00000250365 | CTD-2213F21.2 |
| ENSG00000225431 | AP001626.1           | ENSG00000250366 | TUNAR         |
| ENSG00000225434 | RP11-63P12.6         | ENSG00000250387 | RP11-136K7.2  |
| ENSG00000225437 | RP1-257A15.1         | ENSG00000250400 | LINC00977     |
| ENSG00000225439 | BOLA3-AS1            | ENSG00000250406 | RP13-539F13.3 |
| ENSG00000225470 | JPX                  | ENSG00000250456 | AC006552.1    |
| ENSG00000225484 | RP11-773D16.1        | ENSG00000250490 | FLJ33360      |
| ENSG00000225488 | RP11-760D2.1         | ENSG00000250514 | RP11-96P7.1   |
| ENSG00000225489 | RP11-390F4.3         | ENSG00000250544 | CTC-493L21.1  |
| ENSG00000225493 | LINC01107            | ENSG00000250546 | RP11-8L2.1    |
| ENSG00000225511 | LINC00475            | ENSG00000250582 | SMAD1-AS2     |
| ENSG00000225516 | FAM197Y5             | ENSG00000250584 | RP11-325I22.2 |
| ENSG00000225518 | RP11-396C23.2        | ENSG00000250608 | RP11-933H2.4  |
| ENSG00000225520 | TTY16                | ENSG00000250632 | RP3-513G18.2  |
| ENSG00000225535 | LINC01393            | ENSG00000250634 | LINC01182     |
| ENSG00000225539 | AC018799.1           | ENSG00000250685 | RP11-486L19.2 |
| ENSG00000225564 | RP11-341A22.2        | ENSG00000250696 | RP11-704M14.1 |
| ENSG00000225579 | EDNRB-AS1            | ENSG00000250698 | RP11-392B6.1  |
| ENSG00000225595 | XXbac-BPG308K3.<br>6 | ENSG00000250748 | RP11-230G5.2  |
| ENSG00000225606 | AC005281.2           | ENSG00000250754 | RP11-386B13.3 |
| ENSG00000225619 | MYT1L-AS1            | ENSG00000250770 | RP5-1063M23.1 |
| ENSG00000225626 | C9orf135-AS1         | ENSG00000250772 | LINC01365     |
| ENSG00000225649 | AC064875.2           | ENSG00000250802 | ZBED3-AS1     |
| ENSG00000225670 | CADM3-AS1            | ENSG00000250819 | RP11-576E20.1 |
| ENSG00000225675 | RP4-784A16.5         | ENSG00000250821 | RP11-345F18.1 |
| ENSG00000225683 | RP1-301L19.1         | ENSG00000250822 | CTD-2139B15.4 |
| ENSG00000225684 | FAM225B              | ENSG00000250846 | EPHA5-AS1     |
| ENSG00000225706 | PTPRD-AS1            | ENSG00000250903 | GMDS-AS1      |
| ENSG00000225725 | FAM66E               | ENSG00000250929 | LINC01181     |
| ENSG00000225730 | RP3-365O12.2         | ENSG00000250954 | RP11-79E3.3   |
| ENSG00000225733 | FGD5-AS1             | ENSG00000251002 | AE000661.37   |
| ENSG00000225756 | DBH-AS1              | ENSG00000251003 | ZFPM2-AS1     |
| ENSG00000225778 | PROSER2-AS1          | ENSG00000251011 | TMEM108-AS1   |
| ENSG00000225783 | MIAT                 | ENSG00000251018 | HMMR-AS1      |
| ENSG00000225791 | TRAM2-AS1            | ENSG00000251022 | THAP9-AS1     |
| ENSG00000225793 | RP1-234P15.4         | ENSG00000251034 | RP11-582J16.4 |
| ENSG00000225822 | UBXN7-AS1            | ENSG00000251045 | CTC-321K16.4  |
| ENSG00000225826 | LINC00626            | ENSG00000251095 | RP11-115D19.1 |
| ENSG00000225855 | RUSC1-AS1            | ENSG00000251127 | RP11-280G9.1  |

|                 |                       |                 |                |
|-----------------|-----------------------|-----------------|----------------|
| ENSG00000225860 | RP11-1018N14.2        | ENSG00000251128 | WWC2-AS1       |
| ENSG00000225868 | AC016582.2            | ENSG00000251136 | RP11-37B2.1    |
| ENSG00000225872 | AC002398.5            | ENSG00000251138 | RP11-81H3.2    |
| ENSG00000225877 | AC004603.4            | ENSG00000251161 | RP11-540O11.1  |
| ENSG00000225889 | AC074289.1            | ENSG00000251165 | F11-AS1        |
| ENSG00000225891 | RP3-476K8.3           | ENSG00000251169 | AC005355.2     |
| ENSG00000225914 | XXbac-BPG154L12<br>.4 | ENSG00000251191 | LINC00589      |
| ENSG00000225929 | AC000036.4            | ENSG00000251199 | RP11-400D2.2   |
| ENSG00000225930 | DKFZP434L187          | ENSG00000251209 | LINC00923      |
| ENSG00000225937 | PCA3                  | ENSG00000251210 | RP11-168E17.1  |
| ENSG00000225953 | SATB2-AS1             | ENSG00000251216 | RP11-161D15.3  |
| ENSG00000225969 | LINC00035             | ENSG00000251230 | RP11-701P16.5  |
| ENSG00000226026 | RP11-57H12.3          | ENSG00000251249 | RP11-73G16.1   |
| ENSG00000226031 | FGF13-AS1             | ENSG00000251321 | PCAT4          |
| ENSG00000226051 | ZNF503-AS1            | ENSG00000251322 | SHANK3         |
| ENSG00000226083 | SLC39A12-AS1          | ENSG00000251363 | RP11-129M6.1   |
| ENSG00000226091 | LINC00937             | ENSG00000251364 | CTD-2516F10.2  |
| ENSG00000226125 | AC098823.3            | ENSG00000251381 | LINC00958      |
| ENSG00000226137 | BAIAP2-AS1            | ENSG00000251393 | RP1-240K6.3    |
| ENSG00000226149 | RP1-69D17.4           | ENSG00000251396 | LINC01301      |
| ENSG00000226159 | LINC01375             | ENSG00000251417 | RP11-1348G14.4 |
| ENSG00000226167 | AP4B1-AS1             | ENSG00000251432 | RP11-420A23.1  |
| ENSG00000226194 | RP1-137D17.1          | ENSG00000251442 | LINC01094      |
| ENSG00000226203 | RP4-760C5.5           | ENSG00000251533 | LINC00605      |
| ENSG00000226235 | LEMD1-AS1             | ENSG00000251538 | RP11-166A12.1  |
| ENSG00000226237 | RP11-276H19.1         | ENSG00000251575 | CTD-2170G1.2   |
| ENSG00000226250 | LINC00408             | ENSG00000251600 | RP11-673E1.1   |
| ENSG00000226263 | ISM1-AS1              | ENSG00000251616 | RP11-485M7.3   |
| ENSG00000226266 | AC009961.3            | ENSG00000251629 | RP11-774D14.1  |
| ENSG00000226272 | ARHGAP26-AS1          | ENSG00000251637 | RP11-119D9.1   |
| ENSG00000226287 | TMEM191A              | ENSG00000251661 | RP11-326C3.11  |
| ENSG00000226308 | RP4-813D12.3          | ENSG00000251688 | RP11-752L20.5  |
| ENSG00000226312 | CFLAR-AS1             | ENSG00000253138 | LINC00967      |
| ENSG00000226328 | NUP50-AS1             | ENSG00000253181 | RP11-863K10.2  |
| ENSG00000226362 | FAM41AY2              | ENSG00000253205 | CTD-3046C4.1   |
| ENSG00000226367 | ST7-AS2               | ENSG00000253230 | LINC00599      |
| ENSG00000226380 | MIR29B1               | ENSG00000253267 | DLGAP2-AS1     |
| ENSG00000226383 | AC093375.1            | ENSG00000253279 | FAM183CP       |
| ENSG00000226387 | SORCS3-AS1            | ENSG00000253281 | RP11-716D16.1  |
| ENSG00000226416 | MRPL23-AS1            | ENSG00000253298 | AC008703.1     |
| ENSG00000226419 | SLC16A1-AS1           | ENSG00000253301 | RP11-513O17.2  |
| ENSG00000226440 | RP11-506B6.6          | ENSG00000253302 | STAU2-AS1      |
| ENSG00000226496 | LINC00323             | ENSG00000253314 | LINC00293      |

|                 |               |                 |               |
|-----------------|---------------|-----------------|---------------|
| ENSG00000226510 | UPK1A-AS1     | ENSG00000253327 | RAD21-AS1     |
| ENSG00000226516 | FAM138B       | ENSG00000253352 | TUG1          |
| ENSG00000226567 | LINC00606     | ENSG00000253364 | RP11-731F5.2  |
| ENSG00000226581 | RP11-340I6.8  | ENSG00000253417 | RP11-109J4.1  |
| ENSG00000226620 | LINC00343     | ENSG00000253490 | AC145110.1    |
| ENSG00000226622 | AC092155.4    | ENSG00000253521 | HPYR1         |
| ENSG00000226627 | SHANK2-AS1    | ENSG00000253552 | HOXA-AS2      |
| ENSG00000226648 | RP1-1J6.2     | ENSG00000253584 | CTD-2374C24.1 |
| ENSG00000226674 | TEX41         | ENSG00000253595 | LINC01300     |
| ENSG00000226686 | AC012309.5    | ENSG00000253649 | PRSS51        |
| ENSG00000226688 | ENTPD1-AS1    | ENSG00000253658 | RP11-600K15.1 |
| ENSG00000226706 | RP11-426A6.5  | ENSG00000253661 | ZFHX4-AS1     |
| ENSG00000226707 | RP11-719J20.1 | ENSG00000253669 | KB-1732A1.1   |
| ENSG00000226711 | FAM66C        | ENSG00000253701 | AL928768.3    |
| ENSG00000226722 | LINC00424     | ENSG00000253706 | RP11-758M4.4  |
| ENSG00000226741 | CTA-929C8.6   | ENSG00000253734 | LINC01289     |
| ENSG00000226746 | SMCR5         | ENSG00000253738 | OTUD6B-AS1    |
| ENSG00000226747 | AC007966.1    | ENSG00000253766 | RP11-804N13.1 |
| ENSG00000226752 | PSMD5-AS1     | ENSG00000253837 | RP11-177H13.2 |
| ENSG00000226754 | RP5-1024G6.5  | ENSG00000253868 | FER1L6-AS2    |
| ENSG00000226757 | PP12613       | ENSG00000253871 | RP11-756K15.2 |
| ENSG00000226803 | RP11-203B9.4  | ENSG00000253898 | RP11-51M18.1  |
| ENSG00000226806 | AC011893.3    | ENSG00000253917 | AC226119.5    |
| ENSG00000226828 | RP11-278H7.1  | ENSG00000253925 | CTB-178M22.1  |
| ENSG00000226869 | LHFPL3-AS1    | ENSG00000253932 | RP11-10C8.2   |
| ENSG00000226891 | LINC01359     | ENSG00000253955 | CTB-33O18.3   |
| ENSG00000226900 | RP11-432J24.5 | ENSG00000253974 | NRG1-IT1      |
| ENSG00000226906 | TTY4          | ENSG00000254008 | LINC00051     |
| ENSG00000226913 | BSN-AS2       | ENSG00000254081 | LINC01299     |
| ENSG00000226917 | LINC01276     | ENSG00000254083 | RP11-452N4.1  |
| ENSG00000226935 | LINC00161     | ENSG00000254102 | RP11-21C4.1   |
| ENSG00000226950 | DANCR         | ENSG00000254109 | BPMS-AS1      |
| ENSG00000226953 | AC010890.1    | ENSG00000254129 | CTD-2647L4.1  |
| ENSG00000226995 | LINC00658     | ENSG00000254139 | CTD-2339F6.1  |
| ENSG00000227028 | SLC8A1-AS1    | ENSG00000254154 | RP4-798P15.3  |
| ENSG00000227036 | LINC00511     | ENSG00000254226 | CTB-12O2.1    |
| ENSG00000227039 | ITGB2-AS1     | ENSG00000254231 | CTD-2284J15.1 |
| ENSG00000227060 | LINC00629     | ENSG00000254235 | RP11-115J16.1 |
| ENSG00000227110 | LMCD1-AS1     | ENSG00000254254 | RP11-17A4.2   |
| ENSG00000227115 | RP11-267C16.1 | ENSG00000254266 | RP11-594N15.2 |
| ENSG00000227128 | LBX1-AS1      | ENSG00000254275 | LINC01263     |
| ENSG00000227145 | IL21-AS1      | ENSG00000254303 | RP11-398G24.2 |
| ENSG00000227165 | WDR11-AS1     | ENSG00000254319 | RP11-134O21.1 |
| ENSG00000227189 | AC092535.3    | ENSG00000254334 | RP11-24P4.1   |

|                 |               |                 |                |
|-----------------|---------------|-----------------|----------------|
| ENSG00000227195 | RP3-410C9.1   | ENSG00000254363 | CTB-131B5.5    |
| ENSG00000227248 | FAM155A-IT1   | ENSG00000254369 | HOXA-AS3       |
| ENSG00000227252 | AC105760.2    | ENSG00000254377 | MIR124-2HG     |
| ENSG00000227290 | LINC01364     | ENSG00000254416 | RP11-347E10.1  |
| ENSG00000227306 | AP006285.6    | ENSG00000254451 | RP11-560G2.1   |
| ENSG00000227354 | RBM26-AS1     | ENSG00000254602 | AP000662.4     |
| ENSG00000227372 | TP73-AS1      | ENSG00000254635 | WAC-AS1        |
| ENSG00000227375 | DLG1-AS1      | ENSG00000254654 | AC068858.1     |
| ENSG00000227392 | HPN-AS1       | ENSG00000254703 | SENCR          |
| ENSG00000227398 | KIF9-AS1      | ENSG00000254813 | RP11-252C15.1  |
| ENSG00000227403 | AC009299.3    | ENSG00000254815 | RP11-496I9.1   |
| ENSG00000227418 | PCGEM1        | ENSG00000254842 | RP11-890B15.2  |
| ENSG00000227439 | TTY17B        | ENSG00000254876 | RP11-23J9.5    |
| ENSG00000227456 | LINC00310     | ENSG00000254887 | CTC-378H22.1   |
| ENSG00000227463 | RP11-158D2.2  | ENSG00000254929 | RP11-144G6.12  |
| ENSG00000227467 | RP11-169D4.1  | ENSG00000254936 | AF131215.3     |
| ENSG00000227468 | AL928742.12   | ENSG00000254951 | RP11-494M8.4   |
| ENSG00000227477 | STK4-AS1      | ENSG00000254960 | KIRREL3-AS2    |
| ENSG00000227487 | NCAM1-AS1     | ENSG00000254967 | RP11-680F20.6  |
| ENSG00000227496 | RP11-145A3.1  | ENSG00000255002 | CTD-2509G16.2  |
| ENSG00000227502 | LINC01268     | ENSG00000255036 | RP11-23J9.4    |
| ENSG00000227517 | AC003051.1    | ENSG00000255052 | FAM66D         |
| ENSG00000227528 | DIAPH3-AS1    | ENSG00000255071 | SAA2-SAA4      |
| ENSG00000227533 | SLC2A1-AS1    | ENSG00000255084 | RP11-843A23.1  |
| ENSG00000227540 | RP11-152N13.5 | ENSG00000255087 | RP11-168K9.2   |
| ENSG00000227543 | SPAG5-AS1     | ENSG00000255090 | RP11-820L6.1   |
| ENSG00000227544 | AC018647.3    | ENSG00000255145 | RP11-60I3.5    |
| ENSG00000227617 | CERS6-AS1     | ENSG00000255182 | CTD-2517M22.14 |
| ENSG00000227619 | RP11-492E3.2  | ENSG00000255198 | SNHG9          |
| ENSG00000227630 | LINC01132     | ENSG00000255234 | RP11-727A23.10 |
| ENSG00000227640 | SOX21-AS1     | ENSG00000255240 | RP11-142C4.6   |
| ENSG00000227660 | RP11-162J8.2  | ENSG00000255248 | RP11-166D19.1  |
| ENSG00000227674 | LINC00355     | ENSG00000255267 | RP11-430H10.2  |
| ENSG00000227695 | DNMBP-AS1     | ENSG00000255274 | TMPRSS4-AS1    |
| ENSG00000227702 | LINC00111     | ENSG00000255345 | CTD-2337I7.1   |
| ENSG00000227718 | AC016730.1    | ENSG00000255366 | RP11-1134I14.8 |
| ENSG00000227741 | RP11-536C5.7  | ENSG00000255399 | TBX5-AS1       |
| ENSG00000227764 | RP11-354K1.1  | ENSG00000255414 | LINC01059      |
| ENSG00000227811 | FAM212B-AS1   | ENSG00000255420 | RP11-236J17.3  |
| ENSG00000227844 | RP13-143G15.3 | ENSG00000255429 | RP11-643G5.6   |
| ENSG00000227877 | LINC00948     | ENSG00000255433 | AP000479.1     |
| ENSG00000227888 | FAM66A        | ENSG00000255448 | RP1-59M18.2    |
| ENSG00000227906 | SNAP25-AS1    | ENSG00000255458 | RP11-539G18.2  |
| ENSG00000227908 | FLJ31104      | ENSG00000255476 | RP11-1H15.2    |

|                 |               |                 |                |
|-----------------|---------------|-----------------|----------------|
| ENSG00000227917 | RP11-143M1.3  | ENSG00000255545 | RP11-627G23.1  |
| ENSG00000227953 | LINC01341     | ENSG00000255571 | LINC00925      |
| ENSG00000227954 | EYA4-AS1      | ENSG00000255621 | RP11-377D9.3   |
| ENSG00000227963 | RP5-1074L1.1  | ENSG00000255650 | FAM222A-AS1    |
| ENSG00000228010 | AC073343.13   | ENSG00000255693 | FLJ41278       |
| ENSG00000228016 | RAPGEF4-AS1   | ENSG00000255717 | SNHG1          |
| ENSG00000228021 | RP11-383C5.3  | ENSG00000255723 | RP11-529H2.2   |
| ENSG00000228043 | AC097721.2    | ENSG00000255733 | IFNG-AS1       |
| ENSG00000228044 | RP4-781K5.4   | ENSG00000255794 | RMST           |
| ENSG00000228055 | LINC00864     | ENSG00000255857 | PXN-AS1        |
| ENSG00000228063 | LYPLAL1-AS1   | ENSG00000255864 | RP11-444D3.1   |
| ENSG00000228109 | MF12-AS1      | ENSG00000255970 | RP11-43N5.1    |
| ENSG00000228127 | RP11-12L8.1   | ENSG00000255980 | AP000439.1     |
| ENSG00000228133 | AC099684.1    | ENSG00000256028 | RP11-197N18.2  |
| ENSG00000228135 | AC073128.10   | ENSG00000256115 | RP11-319E16.1  |
| ENSG00000228141 | AC105339.1    | ENSG00000256124 | LINC01152      |
| ENSG00000228189 | RP13-60M5.2   | ENSG00000256128 | LINC00944      |
| ENSG00000228203 | RNF144A-AS1   | ENSG00000256193 | LINC00507      |
| ENSG00000228240 | TTY17A        | ENSG00000256232 | RP11-771K4.1   |
| ENSG00000228274 | RP3-508I15.9  | ENSG00000256508 | RP11-554A11.6  |
| ENSG00000228296 | TTY4C         | ENSG00000256637 | RP11-76I14.1   |
| ENSG00000228309 | LINC01350     | ENSG00000256725 | RP11-662M24.2  |
| ENSG00000228315 | GUSBP11       | ENSG00000256802 | RP11-680F8.1   |
| ENSG00000228327 | RP11-206L10.2 | ENSG00000256943 | RP13-895J2.2   |
| ENSG00000228340 | RP5-1043L13.1 | ENSG00000256982 | CTD-2555A7.2   |
| ENSG00000228363 | AC015971.2    | ENSG00000256995 | RP11-114G22.1  |
| ENSG00000228392 | RP11-343J18.1 | ENSG00000257056 | RP11-966I7.2   |
| ENSG00000228401 | RP11-251M1.1  | ENSG00000257060 | RP11-266O8.1   |
| ENSG00000228408 | RP1-111D6.3   | ENSG00000257069 | RP11-783K16.10 |
| ENSG00000228412 | RP4-625H18.2  | ENSG00000257137 | C12orf80       |
| ENSG00000228414 | LINC01185     | ENSG00000257176 | RP11-996F15.2  |
| ENSG00000228434 | AC004951.6    | ENSG00000257178 | MIR10A         |
| ENSG00000228439 | TSTD3         | ENSG00000257259 | RP11-767I20.1  |
| ENSG00000228484 | RP11-106M7.1  | ENSG00000257275 | RP11-164H13.1  |
| ENSG00000228486 | LINC01125     | ENSG00000257337 | RP11-983P16.4  |
| ENSG00000228495 | LINC01013     | ENSG00000257379 | RP11-793H13.8  |
| ENSG00000228496 | AC106875.1    | ENSG00000257433 | RP1-197B17.3   |
| ENSG00000228544 | CCDC183-AS1   | ENSG00000257520 | RP11-896J10.3  |
| ENSG00000228560 | RP11-550P17.5 | ENSG00000257524 | RP11-203J24.9  |
| ENSG00000228564 | LINC01005     | ENSG00000257550 | RP11-793H13.3  |
| ENSG00000228604 | RP5-872K7.7   | ENSG00000257582 | RP11-129J12.2  |
| ENSG00000228623 | ZNF883        | ENSG00000257621 | FLJ31306       |
| ENSG00000228624 | RP3-399L15.3  | ENSG00000257622 | RP11-44N21.4   |
| ENSG00000228630 | HOTAIR        | ENSG00000257698 | RP11-620J15.3  |

|                 |               |                 |                |
|-----------------|---------------|-----------------|----------------|
| ENSG00000228723 | SRGAP3-AS2    | ENSG00000257711 | RP11-482D24.2  |
| ENSG00000228735 | GS1-18A18.2   | ENSG00000257741 | RP11-540D4.3   |
| ENSG00000228741 | SPATA13       | ENSG00000257762 | RP11-626I20.3  |
| ENSG00000228775 | WEE2-AS1      | ENSG00000257771 | RP11-70F11.8   |
| ENSG00000228784 | LINC00954     | ENSG00000257817 | RP4-601P9.2    |
| ENSG00000228794 | LINC01128     | ENSG00000257829 | RP11-845M18.6  |
| ENSG00000228801 | RP11-110G21.1 | ENSG00000257913 | RP11-386G11.5  |
| ENSG00000228824 | MIR4500HG     | ENSG00000257987 | LINC00935      |
| ENSG00000228889 | UBAC2-AS1     | ENSG00000258057 | BCDIN3D-AS1    |
| ENSG00000228890 | TTY21         | ENSG00000258119 | RP11-804F13.1  |
| ENSG00000228917 | RP11-544M22.8 | ENSG00000258122 | RP11-61A14.1   |
| ENSG00000228933 | RP11-268G12.1 | ENSG00000258135 | RP11-70F11.11  |
| ENSG00000228971 | RP11-286B14.1 | ENSG00000258168 | RP11-588H23.3  |
| ENSG00000228980 | LINC01205     | ENSG00000258185 | RP11-202H2.1   |
| ENSG00000229005 | HNF4A-AS1     | ENSG00000258210 | RP11-478C19.2  |
| ENSG00000229017 | LINC01277     | ENSG00000258220 | RP11-38F22.1   |
| ENSG00000229021 | NBPF18P       | ENSG00000258274 | RP11-887P2.5   |
| ENSG00000229042 | RP1-232N11.2  | ENSG00000258279 | LINC00592      |
| ENSG00000229043 | AC091729.9    | ENSG00000258301 | RP11-488C13.5  |
| ENSG00000229051 | RP5-952N6.1   | ENSG00000258314 | CTD-2314B22.1  |
| ENSG00000229056 | AC020571.3    | ENSG00000258376 | RP4-647C14.2   |
| ENSG00000229102 | RP11-360P21.2 | ENSG00000258390 | RP11-1070N10.4 |
| ENSG00000229105 | RP11-264C15.2 | ENSG00000258399 | MEG8           |
| ENSG00000229124 | VIM-AS1       | ENSG00000258461 | RP11-164J13.1  |
| ENSG00000229127 | AC007038.7    | ENSG00000258473 | RP11-7F17.4    |
| ENSG00000229153 | EPHA1-AS1     | ENSG00000258498 | DIO3OS         |
| ENSG00000229155 | RP11-528A4.2  | ENSG00000258525 | RP11-829H16.3  |
| ENSG00000229175 | LINC00382     | ENSG00000258545 | RP4-755D9.1    |
| ENSG00000229178 | AC069513.4    | ENSG00000258548 | LINC00645      |
| ENSG00000229191 | RP11-168O16.1 | ENSG00000258551 | RP11-661P17.1  |
| ENSG00000229205 | LINC00200     | ENSG00000258561 | RP11-72M17.1   |
| ENSG00000229214 | LINC00242     | ENSG00000258573 | RP11-14J7.6    |
| ENSG00000229236 | TTY10         | ENSG00000258584 | FAM181A-AS1    |
| ENSG00000229240 | LINC00710     | ENSG00000258586 | RP5-1021I20.2  |
| ENSG00000229243 | AC098973.1    | ENSG00000258647 | LINC00930      |
| ENSG00000229311 | LINC01189     | ENSG00000258701 | LINC00638      |
| ENSG00000229373 | LINC00452     | ENSG00000258710 | LINC01193      |
| ENSG00000229404 | LINC00858     | ENSG00000258716 | RP11-661G16.2  |
| ENSG00000229434 | AC017048.1    | ENSG00000258727 | RP11-66N24.3   |
| ENSG00000229525 | AC053503.4    | ENSG00000258735 | LINC00637      |
| ENSG00000229533 | AC003986.5    | ENSG00000258742 | RP11-862G15.1  |
| ENSG00000229558 | SACS-AS1      | ENSG00000258754 | CTD-3049M7.1   |
| ENSG00000229563 | LINC01204     | ENSG00000258766 | DIO2-AS1       |
| ENSG00000229569 | RP11-481G8.2  | ENSG00000258779 | RP11-140I24.1  |

|                 |                |                 |                |
|-----------------|----------------|-----------------|----------------|
| ENSG00000229589 | ACVR2B-AS1     | ENSG00000258785 | CTD-2643K12.2  |
| ENSG00000229613 | RP11-555F9.2   | ENSG00000258791 | LINC00520      |
| ENSG00000229621 | AC018742.1     | ENSG00000258819 | RP11-7F17.3    |
| ENSG00000229649 | RP11-107I14.4  | ENSG00000258867 | LINC01146      |
| ENSG00000229688 | ISPD-AS1       | ENSG00000258891 | RP5-102I20.5   |
| ENSG00000229702 | RP1-274L7.1    | ENSG00000258892 | RP11-193F5.1   |
| ENSG00000229719 | MIR194-2       | ENSG00000258909 | RP11-164C12.2  |
| ENSG00000229727 | AC013460.1     | ENSG00000258920 | FOXN3-AS1      |
| ENSG00000229743 | LINC01159      | ENSG00000258924 | CTB-96E2.3     |
| ENSG00000229766 | RP5-971N18.3   | ENSG00000258929 | RP11-58E21.3   |
| ENSG00000229807 | XIST           | ENSG00000258946 | RP11-58E21.4   |
| ENSG00000229839 | AC018462.2     | ENSG00000258964 | RP11-618G20.1  |
| ENSG00000229847 | EMX2OS         | ENSG00000258977 | RP11-799P8.1   |
| ENSG00000229852 | RP11-398K22.12 | ENSG00000259053 | RP11-33N16.3   |
| ENSG00000229913 | RP11-378I13.1  | ENSG00000259070 | LINC00639      |
| ENSG00000229921 | KIF25-AS1      | ENSG00000259080 | RP11-158I13.2  |
| ENSG00000229950 | TFAP2A-AS1     | ENSG00000259084 | RP11-1070N10.6 |
| ENSG00000229951 | FLJ31356       | ENSG00000259091 | LINC00517      |
| ENSG00000229956 | ZRANB2-AS2     | ENSG00000259114 | AC005484.5     |
| ENSG00000229970 | AC007128.1     | ENSG00000259115 | CTD-2540L5.5   |
| ENSG00000229989 | MIR181A1HG     | ENSG00000259129 | LINC00648      |
| ENSG00000230010 | RP4-568F9.6    | ENSG00000259134 | LINC00924      |
| ENSG00000230023 | RP11-10N16.2   | ENSG00000259150 | LINC00929      |
| ENSG00000230061 | TRPM2-AS       | ENSG00000259163 | RP11-1078H9.5  |
| ENSG00000230091 | TMEM254-AS1    | ENSG00000259176 | RP11-69H14.6   |
| ENSG00000230102 | RP11-407B7.1   | ENSG00000259218 | LINC00928      |
| ENSG00000230131 | RP11-282I1.1   | ENSG00000259222 | RP11-809H16.5  |
| ENSG00000230133 | FLJ33581       | ENSG00000259225 | RP11-1008C21.1 |
| ENSG00000230176 | RP4-779E11.3   | ENSG00000259244 | RP11-182J1.12  |
| ENSG00000230212 | AP000688.14    | ENSG00000259248 | USP3-AS1       |
| ENSG00000230223 | ATXN8OS        | ENSG00000259280 | RP11-122D10.1  |
| ENSG00000230262 | MIRLET7DHG     | ENSG00000259293 | RP11-355N15.1  |
| ENSG00000230269 | RP1-40E16.9    | ENSG00000259334 | LINC00596      |
| ENSG00000230294 | RP13-507P19.2  | ENSG00000259354 | RP11-519G16.3  |
| ENSG00000230314 | ELOVL2-AS1     | ENSG00000259361 | LINC00927      |
| ENSG00000230316 | FEZF1-AS1      | ENSG00000259363 | CTD-2054N24.2  |
| ENSG00000230324 | RP4-705O1.1    | ENSG00000259370 | RP11-1069G10.1 |
| ENSG00000230333 | AC004538.3     | ENSG00000259380 | RP11-346D14.1  |
| ENSG00000230366 | DSCR9          | ENSG00000259410 | RP11-34F13.3   |
| ENSG00000230368 | FAM41C         | ENSG00000259436 | CTC-378H22.2   |
| ENSG00000230400 | RP11-359G22.2  | ENSG00000259476 | RP11-50C13.2   |
| ENSG00000230417 | LINC00856      | ENSG00000259498 | RP11-244F12.3  |
| ENSG00000230426 | ERVMER61-1     | ENSG00000259518 | RP11-597K23.2  |
| ENSG00000230438 | SERPINB9P1     | ENSG00000259527 | LINC00052      |



|                 |               |                 |                |
|-----------------|---------------|-----------------|----------------|
| ENSG00000230448 | LINC00276     | ENSG00000259530 | RP11-259A24.1  |
| ENSG00000230454 | U73166.2      | ENSG00000259536 | RP11-111A22.1  |
| ENSG00000230461 | PROX1-AS1     | ENSG00000259540 | RP11-526I2.1   |
| ENSG00000230471 | LA16c-2F2.8   | ENSG00000259541 | RP11-778O17.4  |
| ENSG00000230487 | PSMG3-AS1     | ENSG00000259555 | RP11-335K5.2   |
| ENSG00000230490 | RP11-141M1.3  | ENSG00000259577 | RP11-430B1.2   |
| ENSG00000230492 | RP4-753D10.5  | ENSG00000259580 | RP11-37C7.1    |
| ENSG00000230513 | THAP7-AS1     | ENSG00000259583 | RP11-66B24.4   |
| ENSG00000230530 | LIMD1-AS1     | ENSG00000259628 | RP11-467H10.2  |
| ENSG00000230550 | RP11-74C13.3  | ENSG00000259641 | RP11-279F6.3   |
| ENSG00000230590 | FTX           | ENSG00000259666 | RP11-307C19.3  |
| ENSG00000230606 | AC159540.1    | ENSG00000259673 | IQCH-AS1       |
| ENSG00000230615 | RP5-1198O20.4 | ENSG00000259687 | LINC01220      |
| ENSG00000230651 | RGPD4-AS1     | ENSG00000259703 | LINC00593      |
| ENSG00000230658 | KLHL7-AS1     | ENSG00000259721 | RP11-758N13.1  |
| ENSG00000230663 | FAM224B       | ENSG00000259768 | RP5-991G20.1   |
| ENSG00000230699 | RP11-54O7.1   | ENSG00000259775 | RP11-45P15.4   |
| ENSG00000230724 | LINC01001     | ENSG00000259786 | CTD-2118P12.1  |
| ENSG00000230725 | RP4-738P15.1  | ENSG00000259827 | RP11-343H19.2  |
| ENSG00000230768 | RP11-251P6.1  | ENSG00000259841 | RP11-488I20.3  |
| ENSG00000230782 | RP11-508N12.2 | ENSG00000259854 | RP11-211G23.1  |
| ENSG00000230876 | LINC00486     | ENSG00000259905 | PWRN1          |
| ENSG00000230937 | MIR205HG      | ENSG00000259923 | RP11-249C24.11 |
| ENSG00000230960 | RP5-1086L22.1 | ENSG00000259954 | IL21R-AS1      |
| ENSG00000231010 | RP6-109B7.2   | ENSG00000259974 | LINC00261      |
| ENSG00000231023 | LINC00326     | ENSG00000259992 | RP11-77K12.8   |
| ENSG00000231028 | LINC00271     | ENSG00000260005 | AC027601.1     |
| ENSG00000231050 | RP1-140A9.1   | ENSG00000260009 | RP11-65J21.1   |
| ENSG00000231074 | HCG18         | ENSG00000260034 | RP11-266L9.2   |
| ENSG00000231105 | RP5-1071N3.1  | ENSG00000260083 | MIR4519        |
| ENSG00000231114 | AC078842.4    | ENSG00000260249 | RP11-401P9.5   |
| ENSG00000231119 | RP4-569M23.2  | ENSG00000260268 | LINC00919      |
| ENSG00000231131 | RP11-346D6.6  | ENSG00000260271 | RP1-45N11.1    |
| ENSG00000231133 | HAR1B         | ENSG00000260276 | RP11-77H9.2    |
| ENSG00000231141 | TTY3          | ENSG00000260280 | SLX1B-SULT1A4  |
| ENSG00000231150 | RP1-207H1.3   | ENSG00000260339 | HEXA-AS1       |
| ENSG00000231154 | MORF4L2-AS1   | ENSG00000260372 | AQP4-AS1       |
| ENSG00000231160 | KLF3-AS1      | ENSG00000260390 | RP11-575I8.1   |
| ENSG00000231163 | CSMD2-AS1     | ENSG00000260392 | RP11-1129I3.1  |
| ENSG00000231177 | LINC00852     | ENSG00000260404 | RP11-384K6.6   |
| ENSG00000231236 | AP001604.3    | ENSG00000260411 | RP11-420N3.2   |
| ENSG00000231252 | RP11-436K8.1  | ENSG00000260423 | RP13-735L24.1  |
| ENSG00000231290 | APCDD1L-AS1   | ENSG00000260439 | LMF1-AS1       |
| ENSG00000231298 | LINC00704     | ENSG00000260440 | RP11-1096D5.1  |

|                 |                      |                 |               |
|-----------------|----------------------|-----------------|---------------|
| ENSG00000231305 | RP11-723O4.2         | ENSG00000260455 | CASC14        |
| ENSG00000231312 | AC007246.3           | ENSG00000260528 | FAM157C       |
| ENSG00000231346 | LINC01160            | ENSG00000260565 | ERVK13-1      |
| ENSG00000231365 | RP11-418J17.1        | ENSG00000260630 | SNAI3-AS1     |
| ENSG00000231407 | RP11-576I22.2        | ENSG00000260643 | RP11-303E16.8 |
| ENSG00000231419 | LINC00689            | ENSG00000260669 | AL136419.6    |
| ENSG00000231426 | RP5-899B16.1         | ENSG00000260676 | RP11-510D19.1 |
| ENSG00000231437 | RP11-88H9.2          | ENSG00000260735 | RP11-72I8.1   |
| ENSG00000231439 | WASIR2               | ENSG00000260737 | LINC01227     |
| ENSG00000231459 | LINC00032            | ENSG00000260750 | RP11-482M8.1  |
| ENSG00000231473 | LINC00441            | ENSG00000260785 | CASC17        |
| ENSG00000231492 | AP003774.5           | ENSG00000260802 | LINC00890     |
| ENSG00000231528 | FAM225A              | ENSG00000260807 | RP11-161M6.2  |
| ENSG00000231532 | LINC01249            | ENSG00000260852 | FBXL19-AS1    |
| ENSG00000231566 | RP5-1158E12.3        | ENSG00000260857 | RP11-80F22.15 |
| ENSG00000231574 | RP11-91K9.1          | ENSG00000260880 | HCCAT5        |
| ENSG00000231607 | DLEU2                | ENSG00000260896 | RP11-314O13.1 |
| ENSG00000231609 | AC009501.4           | ENSG00000260898 | ADPGK-AS1     |
| ENSG00000231638 | AC011738.4           | ENSG00000260899 | RP11-2C24.4   |
| ENSG00000231652 | RP11-553A21.3        | ENSG00000260923 | AC137934.1    |
| ENSG00000231666 | RP11-404O13.1        | ENSG00000260955 | RP11-30L15.6  |
| ENSG00000231674 | LINC00410            | ENSG00000261024 | GS1-279B7.1   |
| ENSG00000231683 | RP1-27K12.2          | ENSG00000261039 | RP11-417E7.2  |
| ENSG00000231690 | LINC00574            | ENSG00000261040 | CTD-2319I12.1 |
| ENSG00000231703 | RP4-669H2.1          | ENSG00000261064 | RP11-1000B6.3 |
| ENSG00000231711 | LINC00899            | ENSG00000261067 | RP11-264B17.3 |
| ENSG00000231713 | AF064860.7           | ENSG00000261083 | RP11-93I21.3  |
| ENSG00000231721 | LINC-PINT            | ENSG00000261094 | RP11-355O1.11 |
| ENSG00000231728 | LL0XNC01-116E7.<br>2 | ENSG00000261122 | FLJ26245      |
| ENSG00000231755 | CHODL-AS1            | ENSG00000261126 | RBFADN        |
| ENSG00000231764 | DLX6-AS1             | ENSG00000261156 | RP11-215E13.1 |
| ENSG00000231768 | LINC01354            | ENSG00000261194 | RP11-704C2.1  |
| ENSG00000231770 | TMEM44-AS1           | ENSG00000261218 | RP11-960L18.1 |
| ENSG00000231782 | LINC00575            | ENSG00000261253 | AC137932.6    |
| ENSG00000231789 | RP11-558F24.4        | ENSG00000261316 | CTC-400I9.1   |
| ENSG00000231806 | PCAT7                | ENSG00000261325 | AC140542.2    |
| ENSG00000231816 | RP4-782L23.1         | ENSG00000261373 | VPS9D1-AS1    |
| ENSG00000231826 | AC016735.2           | ENSG00000261404 | AC009120.4    |
| ENSG00000231889 | TRAF3IP2-AS1         | ENSG00000261442 | RP11-709D24.6 |
| ENSG00000231943 | RP11-395L14.4        | ENSG00000261460 | RP11-106M3.3  |
| ENSG00000231971 | RP11-557H15.3        | ENSG00000261498 | LINC00566     |
| ENSG00000231976 | LINC00202-2          | ENSG00000261553 | RP11-29G8.3   |
| ENSG00000231993 | EP300-AS1            | ENSG00000261582 | RP4-614O4.11  |

|                 |               |                 |                |
|-----------------|---------------|-----------------|----------------|
| ENSG00000231999 | FLJ27354      | ENSG00000261606 | RP11-414J4.2   |
| ENSG00000232021 | LEF1-AS1      | ENSG00000261615 | CTD-2291D10.1  |
| ENSG00000232044 | LINC01105     | ENSG00000261683 | LINC00838      |
| ENSG00000232063 | RP11-307E17.8 | ENSG00000261713 | SSTR5-AS1      |
| ENSG00000232079 | AL035610.1    | ENSG00000261715 | RP11-653G8.2   |
| ENSG00000232084 | LINC01104     | ENSG00000261738 | RP11-945C19.1  |
| ENSG00000232160 | RAP2C-AS1     | ENSG00000261742 | LINC00922      |
| ENSG00000232170 | LINC00708     | ENSG00000261760 | RP11-1223D19.1 |
| ENSG00000232224 | LINC00202-1   | ENSG00000261771 | DYX1C1-CCPG1   |
| ENSG00000232229 | LINC00865     | ENSG00000261777 | RP11-529K1.2   |
| ENSG00000232284 | GNG12-AS1     | ENSG00000261780 | CTD-2354A18.1  |
| ENSG00000232310 | RP11-557H15.4 | ENSG00000261801 | LOXL1-AS1      |
| ENSG00000232401 | LINC00112     | ENSG00000261824 | LINC00662      |
| ENSG00000232406 | RP11-234K24.3 | ENSG00000261856 | CTD-2135D7.4   |
| ENSG00000232416 | BPESC1        | ENSG00000261863 | RP11-141J13.5  |
| ENSG00000232419 | TTY19         | ENSG00000261864 | RP11-67A1.2    |
| ENSG00000232445 | RP11-132A1.4  | ENSG00000261879 | RP11-333E1.1   |
| ENSG00000232504 | AC105053.4    | ENSG00000261924 | CTD-2561B21.5  |
| ENSG00000232520 | AC012507.3    | ENSG00000261971 | RP11-473M20.7  |
| ENSG00000232527 | RP11-14N7.2   | ENSG00000262001 | DLGAP1-AS2     |
| ENSG00000232593 | KANTR         | ENSG00000262152 | LINC00514      |
| ENSG00000232600 | AC084125.4    | ENSG00000262188 | RP11-353N14.4  |
| ENSG00000232648 | RP11-367N14.2 | ENSG00000262468 | RP11-95P2.1    |
| ENSG00000232656 | IDI2-AS1      | ENSG00000262880 | RP11-104H15.7  |
| ENSG00000232677 | LINC00665     | ENSG00000263069 | CTD-2047H16.4  |
| ENSG00000232684 | ATP11A-AS1    | ENSG00000263072 | ZNF213-AS1     |
| ENSG00000232685 | LINC00442     | ENSG00000263212 | LA16c-306E5.3  |
| ENSG00000232712 | RP4-777D9.2   | ENSG00000263214 | ZNF205-AS1     |
| ENSG00000232721 | RP11-403I13.5 | ENSG00000263327 | TAPT1-AS1      |
| ENSG00000232729 | AC083884.8    | ENSG00000263715 | RP11-105N13.4  |
| ENSG00000232756 | RP5-1185I7.1  | ENSG00000263724 | DLGAP1-AS3     |
| ENSG00000232759 | AC002480.3    | ENSG00000263753 | LINC00667      |
| ENSG00000232803 | RP11-93B14.5  | ENSG00000263798 | RP11-6N17.9    |
| ENSG00000232808 | TTY20         | ENSG00000263812 | LINC00908      |
| ENSG00000232821 | AC003986.6    | ENSG00000263874 | LINC00672      |
| ENSG00000232825 | RP5-896L10.1  | ENSG00000263917 | RP11-53I6.2    |
| ENSG00000232827 | LINC01189     | ENSG00000264066 | MIR451A        |
| ENSG00000232860 | SMG7-AS1      | ENSG00000264112 | RP11-159D12.2  |
| ENSG00000232907 | RP5-977B1.7   | ENSG00000264151 | RP11-739N10.1  |
| ENSG00000232909 | RP3-510O8.4   | ENSG00000264243 | RP11-6N17.1    |
| ENSG00000232913 | RP11-429H9.4  | ENSG00000264269 | RP11-15F12.1   |
| ENSG00000232931 | LINC00342     | ENSG00000264515 | CTC-525D6.1    |
| ENSG00000232956 | SNHG15        | ENSG00000264630 | RP11-4F22.2    |
| ENSG00000232973 | CYP1B1-AS1    | ENSG00000264660 | RP11-381P6.1   |

|                 |               |                 |                            |
|-----------------|---------------|-----------------|----------------------------|
| ENSG00000232977 | LINC00327     | ENSG00000264772 | SNORA67                    |
| ENSG00000232995 | RGS5          | ENSG00000264859 | RP11-75N4.2                |
| ENSG00000233006 | AC034220.3    | ENSG00000265091 | RP11-835E18.5              |
| ENSG00000233008 | RP11-475O6.1  | ENSG00000265096 | C1QTNF1-AS1                |
| ENSG00000233013 | FAM157B       | ENSG00000265125 | RP11-31I22.3               |
| ENSG00000233016 | SNHG7         | ENSG00000265142 | MIR133A1HG                 |
| ENSG00000233038 | AC011899.9    | ENSG00000265148 | BZRAP1-AS1                 |
| ENSG00000233058 | LINC00884     | ENSG00000265206 | MIR142                     |
| ENSG00000233093 | LINC00892     | ENSG00000265257 | RP11-21J18.1               |
| ENSG00000233098 | RP11-344E13.3 | ENSG00000265369 | PCAT18                     |
| ENSG00000233101 | HOXB-AS3      | ENSG00000265408 | RP11-361L15.4              |
| ENSG00000233123 | LINC01007     | ENSG00000265479 | DTX2P1-UPK3BP1-<br>PMS2P11 |
| ENSG00000233183 | RP3-468B3.2   | ENSG00000265485 | RP11-449D8.1               |
| ENSG00000233184 | RP11-421L21.3 | ENSG00000265544 | AA06                       |
| ENSG00000233208 | LINC00642     | ENSG00000265688 | MAFG-AS1                   |
| ENSG00000233215 | AP000472.2    | ENSG00000265692 | RP13-516M14.4              |
| ENSG00000233221 | AC133785.1    | ENSG00000265702 | RP11-156L14.1              |
| ENSG00000233237 | LINC00472     | ENSG00000265766 | CXADRP3                    |
| ENSG00000233251 | AC007743.1    | ENSG00000265787 | CYP4F35P                   |
| ENSG00000233261 | LINC00264     | ENSG00000265794 | RP11-227G15.3              |
| ENSG00000233288 | RP11-760D2.5  | ENSG00000265845 | RP11-20B24.5               |
| ENSG00000233296 | AC092159.2    | ENSG00000265933 | LINC00668                  |
| ENSG00000233304 | LINC01346     | ENSG00000265992 | ESRG                       |
| ENSG00000233316 | DSCR10        | ENSG00000266079 | SNORA59B                   |
| ENSG00000233332 | RP4-799P18.2  | ENSG00000266088 | RP5-1028K7.2               |
| ENSG00000233351 | RP1-69D17.3   | ENSG00000266106 | RP11-647F2.2               |
| ENSG00000233354 | LINC00028     | ENSG00000266149 | RP11-789C17.3              |
| ENSG00000233360 | Z83844.1      | ENSG00000266413 | RP11-88L24.4               |
| ENSG00000233392 | AC104809.4    | ENSG00000266560 | RP11-1007I13.4             |
| ENSG00000233395 | LINC00841     | ENSG00000266677 | RP11-258F1.1               |
| ENSG00000233399 | RP11-111I12.1 | ENSG00000266821 | RP11-6N17.2                |
| ENSG00000233410 | LINC01222     | ENSG00000266835 | RP11-838N2.4               |
| ENSG00000233429 | HOTAIRM1      | ENSG00000266904 | LINC00663                  |
| ENSG00000233452 | STXBP5-AS1    | ENSG00000266921 | RP11-15A1.7                |
| ENSG00000233485 | RP3-467K16.2  | ENSG00000266923 | RP11-693J15.4              |
| ENSG00000233491 | AC010091.1    | ENSG00000266929 | RP11-400F19.8              |
| ENSG00000233515 | AL022344.4    | ENSG00000266952 | RP11-909B2.1               |
| ENSG00000233521 | RP5-1172A22.1 | ENSG00000266988 | RP11-749H17.1              |
| ENSG00000233522 | FAM224A       | ENSG00000267002 | RP11-242D8.1               |
| ENSG00000233527 | AC092295.7    | ENSG00000267009 | RP11-120M18.2              |
| ENSG00000233532 | LINC00460     | ENSG00000267013 | CTD-2171N6.1               |
| ENSG00000233542 | RP11-547D24.1 | ENSG00000267014 | CTD-2081K17.2              |
| ENSG00000233559 | AC016831.7    | ENSG00000267039 | RP11-58G13.1               |

|                 |               |                 |                      |
|-----------------|---------------|-----------------|----------------------|
| ENSG00000233570 | LINC00690     | ENSG00000267040 | RP11-35G9.3          |
| ENSG00000233593 | RP4-665J23.1  | ENSG00000267047 | RP11-589P10.7        |
| ENSG00000233630 | FAM138F       | ENSG00000267048 | RP11-566K11.7        |
| ENSG00000233639 | LINC01158     | ENSG00000267058 | RP11-15A1.3          |
| ENSG00000233642 | GPR158-AS1    | ENSG00000267080 | ASB16-AS1            |
| ENSG00000233651 | RP11-111F5.8  | ENSG00000267097 | RP11-309E23.2        |
| ENSG00000233656 | RP11-716O23.1 | ENSG00000267104 | TBC1D3P1-DHX40P<br>1 |
| ENSG00000233694 | AC007365.1    | ENSG00000267107 | PCAT19               |
| ENSG00000233699 | TTY18         | ENSG00000267121 | CTD-2020K17.1        |
| ENSG00000233718 | MYCNOS        | ENSG00000267122 | AC004490.1           |
| ENSG00000233723 | LINC01122     | ENSG00000267128 | RNF157-AS1           |
| ENSG00000233725 | LINC00284     | ENSG00000267134 | RP11-146N18.1        |
| ENSG00000233791 | LINC01136     | ENSG00000267147 | CTC-548K16.1         |
| ENSG00000233800 | RP11-295G24.4 | ENSG00000267149 | CTC-550B14.6         |
| ENSG00000233828 | CTC-242N15.1  | ENSG00000267169 | CTB-5506.12          |
| ENSG00000233854 | POU6F2-AS2    | ENSG00000267174 | CTC-510F12.4         |
| ENSG00000233864 | TTY15         | ENSG00000267188 | CTC-512J12.4         |
| ENSG00000233878 | AC073133.1    | ENSG00000267239 | RP11-794M8.1         |
| ENSG00000233896 | RP4-684O24.5  | ENSG00000267243 | AC005307.3           |
| ENSG00000233926 | RP11-154D17.1 | ENSG00000267244 | CTB-31O20.4          |
| ENSG00000233930 | KRTAP5-AS1    | ENSG00000267254 | ZNF790-AS1           |
| ENSG00000233937 | CTC-338M12.4  | ENSG00000267272 | LINC01140            |
| ENSG00000233968 | RP11-354E11.2 | ENSG00000267278 | MAP3K14-AS1          |
| ENSG00000233973 | LINC01360     | ENSG00000267288 | RP13-890H12.2        |
| ENSG00000233997 | AP000475.2    | ENSG00000267302 | RP11-178C3.2         |
| ENSG00000234026 | RP11-310E22.4 | ENSG00000267313 | KC6                  |
| ENSG00000234028 | AC062029.1    | ENSG00000267325 | RP11-397A16.2        |
| ENSG00000234062 | RP11-308D16.4 | ENSG00000267337 | CTC-782O7.1          |
| ENSG00000234111 | RP11-364P22.1 | ENSG00000267339 | LINC00906            |
| ENSG00000234129 | RP11-120D5.1  | ENSG00000267374 | LINC00669            |
| ENSG00000234155 | RP11-30P6.6   | ENSG00000267413 | RP11-636O21.1        |
| ENSG00000234171 | RNASEH1-AS1   | ENSG00000267439 | AC002398.11          |
| ENSG00000234177 | LINC01114     | ENSG00000267454 | ZNF582-AS1           |
| ENSG00000234186 | C16orf82      | ENSG00000267465 | AC011525.4           |
| ENSG00000234199 | LINC01191     | ENSG00000267470 | ZNF571-AS1           |
| ENSG00000234229 | RP11-308N19.4 | ENSG00000267506 | RP11-13K12.1         |
| ENSG00000234264 | DEPDC1-AS1    | ENSG00000267532 | MIR497HG             |
| ENSG00000234277 | CTD-2090I13.1 | ENSG00000267535 | LINC00868            |
| ENSG00000234323 | RP11-308N19.1 | ENSG00000267559 | RP11-383M4.6         |
| ENSG00000234336 | JAZF1-AS1     | ENSG00000267575 | CTC-459F4.3          |
| ENSG00000234350 | AC007405.4    | ENSG00000267581 | CTC-559E9.4          |
| ENSG00000234352 | MIR490        | ENSG00000267586 | LINC00907            |
| ENSG00000234377 | RNF219-AS1    | ENSG00000267603 | LINC01028            |

|                 |               |                 |               |
|-----------------|---------------|-----------------|---------------|
| ENSG00000234380 | AP000330.8    | ENSG00000267606 | AC006116.21   |
| ENSG00000234384 | LINC01049     | ENSG00000267629 | AC138430.4    |
| ENSG00000234423 | LINC01250     | ENSG00000267640 | CTD-2554C21.2 |
| ENSG00000234437 | RP1-206D15.3  | ENSG00000267665 | RP11-13K12.2  |
| ENSG00000234449 | RP11-706O15.3 | ENSG00000267690 | LDLRAD4-AS1   |
| ENSG00000234456 | MAGI2-AS3     | ENSG00000267696 | CTB-151G24.1  |
| ENSG00000234492 | RPL34-AS1     | ENSG00000267698 | AC002116.7    |
| ENSG00000234497 | ERICH3-AS1    | ENSG00000267709 | AC024592.9    |
| ENSG00000234509 | AP000253.1    | ENSG00000267712 | RP11-456O19.4 |
| ENSG00000234572 | AC007880.1    | ENSG00000267750 | AC003102.3    |
| ENSG00000234608 | MAPKAPK5-AS1  | ENSG00000267761 | CTD-2130O13.1 |
| ENSG00000234636 | MED14OS       | ENSG00000267767 | CTC-523E23.4  |
| ENSG00000234661 | CHL1-AS1      | ENSG00000267779 | CTC-360P9.3   |
| ENSG00000234663 | AC104820.2    | ENSG00000267787 | RP11-35G9.5   |
| ENSG00000234665 | RP11-262H14.3 | ENSG00000267827 | CTC-471J1.8   |
| ENSG00000234684 | SDCBP2-AS1    | ENSG00000267858 | AC016629.8    |
| ENSG00000234688 | RP1-293L6.1   | ENSG00000267943 | CTD-2620I22.3 |
| ENSG00000234690 | AC073283.4    | ENSG00000268006 | PTOV1-AS1     |
| ENSG00000234696 | GPR50-AS1     | ENSG00000268038 | AC011516.2    |
| ENSG00000234736 | FAM170B-AS1   | ENSG00000268049 | CTD-2619J13.9 |
| ENSG00000234741 | GAS5          | ENSG00000268061 | NAPA-AS1      |
| ENSG00000234754 | C1orf140      | ENSG00000268119 | CTD-2561J22.5 |
| ENSG00000234771 | RP11-395P17.3 | ENSG00000268218 | AC137932.4    |
| ENSG00000234773 | CTD-2666L21.1 | ENSG00000268230 | CTD-2619J13.8 |
| ENSG00000234787 | LINC00458     | ENSG00000268240 | RP11-678G14.4 |
| ENSG00000234807 | LINC01135     | ENSG00000268262 | CTC-246B18.8  |
| ENSG00000234810 | RP11-466L17.1 | ENSG00000268362 | CTD-2017D11.1 |
| ENSG00000234817 | RP3-400B16.1  | ENSG00000268364 | SMC5-AS1      |
| ENSG00000234828 | RP11-526A4.1  | ENSG00000268388 | FENDRR        |
| ENSG00000234840 | LINC01239     | ENSG00000268460 | DKFZp434J0226 |
| ENSG00000234855 | RP11-453E2.2  | ENSG00000268516 | CTD-3138B18.5 |
| ENSG00000234859 | AC003958.2    | ENSG00000268530 | CTC-273B12.5  |
| ENSG00000234880 | LINC00163     | ENSG00000268573 | RP11-158H5.7  |
| ENSG00000234883 | MIR155HG      | ENSG00000268575 | RP1-283E3.8   |
| ENSG00000234899 | SOX9-AS1      | ENSG00000268621 | AC006262.5    |
| ENSG00000234902 | AC007879.2    | ENSG00000268649 | MIR296        |
| ENSG00000234912 | SNHG20        | ENSG00000268654 | MIMT1         |
| ENSG00000234945 | GTF3C2-AS1    | ENSG00000268658 | LINC00664     |
| ENSG00000234962 | LINC00700     | ENSG00000268751 | SCGB1B2P      |
| ENSG00000234986 | XX-C2158C12.1 | ENSG00000268818 | CITF22-62D4.1 |
| ENSG00000234996 | RP11-480I12.7 | ENSG00000268894 | PLCE1-AS1     |
| ENSG00000235016 | RP11-493K19.3 | ENSG00000268895 | A1BG-AS1      |
| ENSG00000235023 | AP001626.2    | ENSG00000269086 | CTC-523E23.5  |
| ENSG00000235026 | DPP10-AS1     | ENSG00000269107 | RP11-15H20.7  |

|                 |               |                 |                |
|-----------------|---------------|-----------------|----------------|
| ENSG00000235033 | RP11-61I13.3  | ENSG00000269110 | CTC-513N18.7   |
| ENSG00000235049 | LINC00940     | ENSG00000269235 | HCCAT3         |
| ENSG00000235054 | RP5-1166F10.1 | ENSG00000269243 | CTD-2231E14.8  |
| ENSG00000235106 | LINC00094     | ENSG00000269289 | CTB-92J24.3    |
| ENSG00000235118 | AC010731.4    | ENSG00000269293 | ZSCAN16-AS1    |
| ENSG00000235123 | DSCAM-AS1     | ENSG00000269386 | RAB11B-AS1     |
| ENSG00000235139 | AC003984.1    | ENSG00000269416 | LINC01224      |
| ENSG00000235142 | RP1-60O19.1   | ENSG00000269535 | CTD-2525I3.6   |
| ENSG00000235172 | LINC01366     | ENSG00000269604 | AC005523.2     |
| ENSG00000235244 | RP11-761E20.1 | ENSG00000269609 | RPARP-AS1      |
| ENSG00000235257 | ITGA9-AS1     | ENSG00000269640 | CTD-2521M24.9  |
| ENSG00000235295 | FLJ41941      | ENSG00000269696 | AC007228.11    |
| ENSG00000235304 | LINC01281     | ENSG00000269749 | AC005614.5     |
| ENSG00000235381 | RP11-477D19.2 | ENSG00000269793 | AC006115.3     |
| ENSG00000235387 | LINC00961     | ENSG00000269834 | CTD-3018O17.3  |
| ENSG00000235408 | SNORA71B      | ENSG00000269893 | SNHG8          |
| ENSG00000235412 | TTY4B         | ENSG00000269959 | SPACA6P-AS     |
| ENSG00000235437 | LINC01278     | ENSG00000269994 | RP11-276H19.2  |
| ENSG00000235453 | TOPORS-AS1    | ENSG00000270002 | RP11-93H12.4   |
| ENSG00000235475 | LINC01372     | ENSG00000270066 | SCARNA2        |
| ENSG00000235480 | RP11-363D14.1 | ENSG00000270246 | SNORD109A      |
| ENSG00000235481 | UBE2R2-AS1    | ENSG00000270279 | RP4-806M20.5   |
| ENSG00000235513 | RP4-756G23.5  | ENSG00000270362 | HMG3-AS1       |
| ENSG00000235527 | HIPK1-AS1     | ENSG00000270547 | LINC01235      |
| ENSG00000235532 | LINC00402     | ENSG00000270574 | RP11-171I2.2   |
| ENSG00000235535 | RP11-532N4.2  | ENSG00000270580 | RP11-1186N24.5 |
| ENSG00000235560 | AC002310.12   | ENSG00000270641 | TSIX           |
| ENSG00000235563 | RP11-334A14.8 | ENSG00000270726 | AJ271736.10    |
| ENSG00000235584 | AC008268.1    | ENSG00000271086 | NAMA           |
| ENSG00000235590 | GNAS-AS1      | ENSG00000271147 | RP4-769N13.6   |
| ENSG00000235597 | LINC01102     | ENSG00000271270 | TMCC1-AS1      |
| ENSG00000235609 | AF127936.7    | ENSG00000271430 | RP3-368A4.5    |
| ENSG00000235621 | LINC00494     | ENSG00000271593 | RP11-335E6.4   |
| ENSG00000235641 | LINC00484     | ENSG00000271758 | RP11-35J10.5   |
| ENSG00000235652 | RP11-545I5.3  | ENSG00000271762 | RP11-213H15.4  |
| ENSG00000235665 | LINC00298     | ENSG00000271816 | BMS1P4         |
| ENSG00000235699 | CXorf51B      | ENSG00000271826 | PLS3-AS1       |
| ENSG00000235703 | LINC00894     | ENSG00000271853 | RP1-178F15.5   |
| ENSG00000235706 | DICER1-AS1    | ENSG00000271880 | RP11-96C23.5   |
| ENSG00000235726 | AC010148.1    | ENSG00000271894 | RP11-482H16.1  |
| ENSG00000235733 | RP3-522P13.3  | ENSG00000272005 | RP11-91J19.4   |
| ENSG00000235740 | RP11-436I24.1 | ENSG00000272009 | RP1-313I6.12   |
| ENSG00000235770 | LINC00607     | ENSG00000272030 | RP1-178F15.4   |
| ENSG00000235831 | BHLHE40-AS1   | ENSG00000272053 | RP11-367G6.3   |

|                 |               |                 |                |
|-----------------|---------------|-----------------|----------------|
| ENSG00000235862 | RP11-338C15.5 | ENSG00000272084 | RP5-1126H10.2  |
| ENSG00000235884 | LINC00941     | ENSG00000272097 | RP11-421M1.8   |
| ENSG00000235885 | AC023115.2    | ENSG00000272140 | RP11-574K11.29 |
| ENSG00000235897 | TM4SF19-AS1   | ENSG00000272142 | RP11-428J1.5   |
| ENSG00000235903 | CPB2-AS1      | ENSG00000272154 | AC005754.7     |
| ENSG00000235914 | MACROD2-AS1   | ENSG00000272168 | CASC15         |
| ENSG00000235947 | EGOT          | ENSG00000272180 | RP11-481J13.1  |
| ENSG00000235954 | TTC28-AS1     | ENSG00000272259 | RP11-305P22.9  |
| ENSG00000235958 | UBOX5-AS1     | ENSG00000272298 | RP11-386M24.8  |
| ENSG00000235989 | MORC2-AS1     | ENSG00000272328 | RP4-594A5.1    |
| ENSG00000235994 | RP3-470B24.5  | ENSG00000272329 | RP11-65L19.4   |
| ENSG00000235997 | AC109642.1    | ENSG00000272446 | RP1-225E12.3   |
| ENSG00000236013 | RP3-332B22.1  | ENSG00000272485 | RP11-284J1.1   |
| ENSG00000236017 | ASMTL-AS1     | ENSG00000272508 | RP11-96C23.14  |
| ENSG00000236065 | RP1-117O3.2   | ENSG00000272549 | RP11-351J23.2  |
| ENSG00000236088 | COX10-AS1     | ENSG00000272568 | CTB-113D17.1   |
| ENSG00000236107 | AC010127.3    | ENSG00000272610 | MAGI1-IT1      |
| ENSG00000236133 | LINC01069     | ENSG00000272620 | AFAP1-AS1      |
| ENSG00000236144 | AD000090.2    | ENSG00000272657 | AP000320.7     |
| ENSG00000236200 | KDM4A-AS1     | ENSG00000272679 | RP11-216L13.18 |
| ENSG00000236268 | LINC01361     | ENSG00000272736 | RP11-799N11.1  |
| ENSG00000236301 | MRGPRG-AS1    | ENSG00000272780 | RP11-822E23.8  |
| ENSG00000236306 | LINC01241     | ENSG00000272801 | RP1-170O19.23  |
| ENSG00000236333 | TRHDE-AS1     | ENSG00000272815 | RP11-219A15.4  |
| ENSG00000236340 | AC000099.1    | ENSG00000272884 | RP11-104H15.10 |
| ENSG00000236366 | RP11-440G9.1  | ENSG00000272888 | AC013394.2     |
| ENSG00000236383 | LINC00854     | ENSG00000272902 | RP11-299H21.1  |
| ENSG00000236384 | LINC00479     | ENSG00000272917 | RP11-705C15.5  |
| ENSG00000236404 | VLDLR-AS1     | ENSG00000272944 | CTD-2308L22.1  |
| ENSG00000236423 | LINC01134     | ENSG00000272949 | RP11-514P8.8   |
| ENSG00000236432 | AC097662.2    | ENSG00000272975 | MYHAS          |
| ENSG00000236438 | FAM157A       | ENSG00000273000 | KB-1572G7.2    |
| ENSG00000236445 | LINC00608     | ENSG00000273018 | CTD-2303H24.2  |
| ENSG00000236449 | AC018890.6    | ENSG00000273065 | RP11-58E21.5   |
| ENSG00000236466 | RP11-795J1.1  | ENSG00000273066 | RP11-216L13.19 |
| ENSG00000236467 | RP11-443A13.5 | ENSG00000273112 | RP11-25K21.6   |
| ENSG00000236532 | AL035610.2    | ENSG00000273125 | RP11-115H18.1  |
| ENSG00000236548 | STL           | ENSG00000273184 | RP11-212P7.3   |
| ENSG00000236653 | AC005235.1    | ENSG00000273189 | CTD-3148I10.15 |
| ENSG00000236656 | RP11-144L1.4  | ENSG00000273299 | CTB-13L3.1     |
| ENSG00000236671 | PRKG1-AS1     | ENSG00000273311 | DGCR11         |
| ENSG00000236678 | LINC00347     | ENSG00000273313 | RBAKDN         |
| ENSG00000236700 | LINC01010     | ENSG00000273328 | RP11-141M3.6   |
| ENSG00000236719 | OVAAL         | ENSG00000273345 | CTD-2410N18.4  |



|                 |                |                 |               |
|-----------------|----------------|-----------------|---------------|
| ENSG00000236740 | RP11-411K7.1   | ENSG00000273409 | RP11-480C22.1 |
| ENSG00000236751 | LINC01186      | ENSG00000273432 | RP5-1165K10.2 |
| ENSG00000236753 | MKLN1-AS       | ENSG00000273471 | RP13-1039J1.4 |
| ENSG00000236780 | AC078941.1     | ENSG00000198788 | MUC2          |
| ENSG00000236790 | LINC00299      | ENSG00000206082 | LINC01002     |
| ENSG00000236810 | TCEB3-AS1      | ENSG00000218839 | FAM138C       |
| ENSG00000236830 | CBR3-AS1       | ENSG00000225489 | RP11-390F4.3  |
| ENSG00000236850 | BMS1P20        | ENSG00000225706 | PTPRD-AS1     |
| ENSG00000236854 | AL121656.5     | ENSG00000227917 | RP11-143M1.3  |
| ENSG00000236859 | NIFK-AS1       | ENSG00000230724 | LINC01001     |
| ENSG00000236908 | RP5-1063M23.2  | ENSG00000233296 | AC092159.2    |
| ENSG00000236914 | RP11-1008C21.2 | ENSG00000233630 | FAM138F       |
| ENSG00000236963 | LINC01141      | ENSG00000236404 | VLDLR-AS1     |
| ENSG00000236990 | RP11-433J20.1  | ENSG00000237613 | FAM138A       |
| ENSG00000237021 | RP3-486I3.7    | ENSG00000240859 | AC093627.10   |
| ENSG00000237037 | NDUFA6-AS1     | ENSG00000247095 | MIR210HG      |
| ENSG00000237048 | TTY12          | ENSG00000251661 | RP11-326C3.11 |
| ENSG00000237069 | TTY23B         | ENSG00000254815 | RP11-496I9.1  |
| ENSG00000237070 | AC005550.3     | ENSG00000263724 | DLGAP1-AS3    |
| ENSG00000237094 | RP4-669L17.10  | ENSG00000272485 | RP11-284J1.1  |

---

**Supplementary Table S3.** List of GO terms enriched in 10 clusters (Top 10 terms for each cluster are listed).

| Cluster  | GO Term    | Definition                                             | P-value  | FDR      |
|----------|------------|--------------------------------------------------------|----------|----------|
| cluster1 | GO:0042981 | regulation of apoptosis                                | 6.10E-09 | 1.20E-05 |
| cluster1 | GO:43067   | regulation of programmed cell death                    | 8.00E-09 | 7.90E-06 |
| cluster1 | GO:0010941 | regulation of cell death                               | 8.80E-09 | 5.80E-06 |
| cluster1 | GO:0012501 | programmed cell death                                  | 1.30E-08 | 6.60E-06 |
| cluster1 | GO:0008219 | cell death                                             | 1.40E-08 | 5.60E-06 |
| cluster1 | GO:0016265 | death                                                  | 1.70E-08 | 5.50E-06 |
| cluster1 | GO:0006915 | apoptosis                                              | 3.50E-08 | 9.90E-06 |
| cluster1 | GO:0051329 | interphase of mitotic cell cycle                       | 9.50E-08 | 2.40E-05 |
| cluster1 | GO:0051325 | interphase                                             | 1.30E-07 | 2.90E-05 |
| cluster1 | GO:0051329 | positive regulation of molecular function              | 2.50E-07 | 4.90E-05 |
| cluster2 | GO:0007049 | cell cycle                                             | 2.10E-11 | 4.50E-08 |
| cluster2 | GO:0042127 | regulation of cell proliferation                       | 1.20E-10 | 1.30E-07 |
| cluster2 | GO:0042981 | regulation of apoptosis                                | 3.00E-09 | 2.10E-06 |
| cluster2 | GO:0043067 | regulation of programmed cell death                    | 3.90E-09 | 2.10E-06 |
| cluster2 | GO:0010941 | regulation of cell death                               | 4.30E-09 | 1.90E-06 |
| cluster2 | GO:0010033 | response to organic substance                          | 7.00E-09 | 2.50E-06 |
| cluster2 | GO:0009719 | response to endogenous stimulus                        | 1.20E-08 | 3.80E-06 |
| cluster2 | GO:0010604 | positive regulation of macromolecule metabolic process | 1.70E-08 | 4.60E-06 |
| cluster2 | GO:0043066 | negative regulation of apoptosis                       | 1.90E-08 | 4.60E-06 |
| cluster2 | GO:0043069 | negative regulation of programmed cell death           | 2.50E-08 | 5.30E-06 |
| cluster3 | GO:0010604 | positive regulation of macromolecule metabolic process | 3.50E-11 | 3.60E-08 |
| cluster3 | GO:0051329 | interphase of mitotic cell cycle                       | 2.10E-10 | 1.50E-07 |
| cluster3 | GO:0043067 | regulation of programmed cell death                    | 3.00E-10 | 1.60E-07 |
| cluster3 | GO:0010941 | regulation of cell death                               | 3.40E-10 | 1.40E-07 |
| cluster3 | GO:0042981 | regulation of apoptosis                                | 8.00E-10 | 2.80E-07 |
| cluster3 | GO:0031328 | positive regulation of cellular biosynthetic process   | 5.40E-09 | 1.60E-06 |
| cluster3 | GO:0009891 | positive regulation of biosynthetic process            | 7.80E-09 | 2.00E-06 |
| cluster3 | GO:0043069 | negative regulation of programmed cell death           | 1.20E-08 | 2.70E-06 |
| cluster3 | GO:0051726 | regulation of cell cycle                               | 1.20E-08 | 2.40E-06 |
| cluster3 | GO:0060548 | negative regulation of cell death                      | 1.20E-08 | 2.30E-06 |
| cluster4 | GO:0042981 | regulation of apoptosis                                | 1.10E-05 | 1.70E-02 |
| cluster4 | GO:0043067 | regulation of programmed cell death                    | 1.30E-05 | 1.00E-02 |
| cluster4 | GO:0010941 | regulation of cell death                               | 1.40E-05 | 7.10E-03 |
| cluster4 | GO:0051329 | interphase of mitotic cell cycle                       | 3.40E-05 | 1.20E-02 |
| cluster4 | GO:0051325 | interphase                                             | 4.10E-05 | 1.20E-02 |
| cluster4 | GO:0007049 | cell cycle                                             | 5.60E-05 | 1.40E-02 |
| cluster4 | GO:0043065 | positive regulation of apoptosis                       | 6.30E-05 | 1.30E-02 |
| cluster4 | GO:0043068 | positive regulation of programmed cell death           | 6.90E-05 | 1.30E-02 |

|          |            |                                                                                              |          |          |
|----------|------------|----------------------------------------------------------------------------------------------|----------|----------|
| cluster4 | GO:0010942 | positive regulation of cell death                                                            | 7.20E-05 | 1.20E-02 |
| cluster4 | GO:0043488 | regulation of mRNA stability                                                                 | 1.30E-04 | 1.80E-02 |
| cluster5 | GO:0042127 | regulation of cell proliferation                                                             | 7.90E-14 | 1.60E-10 |
| cluster5 | GO:0051325 | interphase                                                                                   | 1.40E-11 | 1.40E-08 |
| cluster5 | GO:0012501 | programmed cell death                                                                        | 1.50E-11 | 1.00E-08 |
| cluster5 | GO:0007049 | cell cycle                                                                                   | 6.00E-11 | 3.10E-08 |
| cluster5 | GO:0043067 | regulation of programmed cell death                                                          | 6.30E-11 | 2.60E-08 |
| cluster5 | GO:0010941 | regulation of cell death                                                                     | 7.10E-11 | 2.40E-08 |
| cluster5 | GO:0000082 | G1/S transition of mitotic cell cycle                                                        | 7.50E-11 | 2.20E-08 |
| cluster5 | GO:0010604 | positive regulation of macromolecule metabolic process                                       | 9.10E-11 | 2.30E-08 |
| cluster5 | GO:0051329 | interphase of mitotic cell cycle                                                             | 1.10E-10 | 2.40E-08 |
| cluster5 | GO:0051726 | regulation of cell cycle                                                                     | 1.60E-10 | 3.30E-08 |
| cluster6 | GO:0045944 | positive regulation of transcription from RNA polymerase II promoter                         | 3.80E-07 | 6.10E-04 |
| cluster6 | GO:0006974 | response to DNA damage stimulus                                                              | 4.10E-07 | 3.30E-04 |
| cluster6 | GO:0045893 | positive regulation of transcription, DNA-dependent                                          | 6.40E-07 | 3.40E-04 |
| cluster6 | GO:0051254 | positive regulation of RNA metabolic process                                                 | 7.30E-07 | 2.90E-04 |
| cluster6 | GO:0010629 | negative regulation of gene expression                                                       | 1.50E-06 | 4.70E-04 |
| cluster6 | GO:0045934 | negative regulation of nucleobase, nucleoside, nucleotide and nucleic acid metabolic process | 1.90E-06 | 4.90E-04 |
| cluster6 | GO:0007049 | cell cycle                                                                                   | 1.90E-06 | 4.30E-04 |
| cluster6 | GO:0010033 | response to organic substance                                                                | 1.90E-06 | 3.70E-04 |
| cluster6 | GO:0006357 | regulation of transcription from RNA polymerase II promoter                                  | 2.20E-06 | 3.80E-04 |
| cluster6 | GO:0051172 | negative regulation of nitrogen compound metabolic process                                   | 2.30E-06 | 3.60E-04 |
| cluster7 | GO:0045597 | positive regulation of cell differentiation                                                  | 6.70E-15 | 1.40E-11 |
| cluster7 | GO:0042127 | regulation of cell proliferation                                                             | 1.70E-14 | 1.80E-11 |
| cluster7 | GO:0051094 | positive regulation of developmental process                                                 | 7.60E-14 | 5.30E-11 |
| cluster7 | GO:0009890 | negative regulation of biosynthetic process                                                  | 1.00E-12 | 5.30E-10 |
| cluster7 | GO:0031327 | negative regulation of cellular biosynthetic process                                         | 2.80E-12 | 1.20E-09 |
| cluster7 | GO:0043067 | regulation of programmed cell death                                                          | 4.40E-12 | 1.50E-09 |
| cluster7 | GO:0010941 | regulation of cell death                                                                     | 4.90E-12 | 1.50E-09 |
| cluster7 | GO:0045934 | negative regulation of nucleobase, nucleoside, nucleotide and nucleic acid metabolic process | 5.90E-12 | 1.50E-09 |
| cluster7 | GO:0010558 | negative regulation of macromolecule biosynthetic process                                    | 6.90E-12 | 1.60E-09 |
| cluster7 | GO:0051172 | negative regulation of nitrogen compound metabolic process                                   | 8.40E-12 | 1.80E-09 |
| cluster8 | GO:0042981 | regulation of apoptosis                                                                      | 1.10E-17 | 2.50E-14 |
| cluster8 | GO:0043067 | regulation of programmed cell death                                                          | 1.60E-17 | 1.90E-14 |

|           |            |                                                                                              |          |          |
|-----------|------------|----------------------------------------------------------------------------------------------|----------|----------|
| cluster8  | GO:0010941 | regulation of cell death                                                                     | 1.90E-17 | 1.40E-14 |
| cluster8  | GO:0042127 | regulation of cell proliferation                                                             | 9.30E-16 | 5.00E-13 |
| cluster8  | GO:0010604 | positive regulation of macromolecule metabolic process                                       | 4.20E-15 | 1.90E-12 |
| cluster8  | GO:0043066 | negative regulation of apoptosis                                                             | 3.10E-14 | 1.20E-11 |
| cluster8  | GO:0043069 | negative regulation of programmed cell death                                                 | 4.40E-14 | 1.40E-11 |
| cluster8  | GO:0060548 | negative regulation of cell death                                                            | 4.70E-14 | 1.30E-11 |
| cluster8  | GO:0051726 | regulation of cell cycle                                                                     | 1.90E-12 | 4.90E-10 |
| cluster8  | GO:0045597 | positive regulation of cell differentiation                                                  | 2.00E-12 | 4.70E-10 |
| cluster9  | GO:0042127 | regulation of cell proliferation                                                             | 3.20E-15 | 6.50E-12 |
| cluster9  | GO:0008285 | negative regulation of cell proliferation                                                    | 6.10E-11 | 6.10E-08 |
| cluster9  | GO:0019220 | regulation of phosphate metabolic process                                                    | 3.80E-09 | 2.60E-06 |
| cluster9  | GO:0051174 | regulation of phosphorus metabolic process                                                   | 3.80E-09 | 2.60E-06 |
| cluster9  | GO:0051338 | regulation of transferase activity                                                           | 3.90E-09 | 2.00E-06 |
| cluster9  | GO:0043067 | regulation of programmed cell death                                                          | 8.40E-09 | 3.40E-06 |
| cluster9  | GO:0042325 | regulation of phosphorylation                                                                | 8.70E-09 | 2.90E-06 |
| cluster9  | GO:0010941 | regulation of cell death                                                                     | 9.10E-09 | 2.60E-06 |
| cluster9  | GO:0048545 | response to steroid hormone stimulus                                                         | 1.10E-08 | 2.70E-06 |
| cluster9  | GO:0043549 | regulation of kinase activity                                                                | 1.10E-08 | 2.40E-06 |
| cluster10 | GO:0010604 | positive regulation of macromolecule metabolic process                                       | 3.60E-11 | 5.90E-08 |
| cluster10 | GO:0051254 | positive regulation of RNA metabolic process                                                 | 5.40E-10 | 4.40E-07 |
| cluster10 | GO:0010628 | positive regulation of gene expression                                                       | 6.30E-10 | 3.40E-07 |
| cluster10 | GO:0043067 | regulation of programmed cell death                                                          | 1.20E-09 | 4.70E-07 |
| cluster10 | GO:0010941 | regulation of cell death                                                                     | 1.30E-09 | 4.10E-07 |
| cluster10 | GO:0042325 | regulation of phosphorylation                                                                | 1.80E-09 | 5.00E-07 |
| cluster10 | GO:0007049 | cell cycle                                                                                   | 2.00E-09 | 4.70E-07 |
| cluster10 | GO:0006357 | regulation of transcription from RNA polymerase II promoter                                  | 2.40E-09 | 4.80E-07 |
| cluster10 | GO:0045935 | positive regulation of nucleobase, nucleoside, nucleotide and nucleic acid metabolic process | 2.60E-09 | 4.80E-07 |
| cluster10 | GO:0045893 | positive regulation of transcription, DNA-dependent                                          | 2.80E-09 | 4.60E-07 |

---

**Supplementary Table S4.** List of KEGG pathways enriched in 10 clusters (Top 10 pathways for each cluster are listed).

| <b>Cluster</b> | <b>Pathway</b> | <b>Definition</b>          | <b>P-value</b> | <b>FDR</b> |
|----------------|----------------|----------------------------|----------------|------------|
| cluster1       | path:05215     | Prostate cancer            | 3.10E-10       | 3.40E-08   |
| cluster1       | path:05220     | Chronic myeloid leukemia   | 3.90E-08       | 2.10E-06   |
| cluster1       | path:05200     | Pathways in cancer         | 5.20E-08       | 1.90E-06   |
| cluster1       | path:05214     | Glioma                     | 5.80E-08       | 1.60E-06   |
| cluster1       | path:05218     | Melanoma                   | 2.10E-07       | 4.60E-06   |
| cluster1       | path:04110     | Cell cycle                 | 2.80E-07       | 5.10E-06   |
| cluster1       | path:05210     | Colorectal cancer          | 1.20E-06       | 1.90E-05   |
| cluster1       | path:05223     | Non-small cell lung cancer | 1.50E-06       | 2.10E-05   |
| cluster1       | path:05211     | Renal cell carcinoma       | 1.70E-06       | 2.10E-05   |
| cluster1       | path:05222     | Small cell lung cancer     | 9.10E-06       | 1.00E-04   |
| cluster2       | path:05200     | Pathways in cancer         | 1.80E-12       | 2.20E-10   |
| cluster2       | path:05218     | Melanoma                   | 5.50E-11       | 3.30E-09   |
| cluster2       | path:05220     | Chronic myeloid leukemia   | 1.30E-10       | 5.10E-09   |
| cluster2       | path:05214     | Glioma                     | 1.60E-09       | 4.80E-08   |
| cluster2       | path:05219     | Bladder cancer             | 2.00E-09       | 4.90E-08   |
| cluster2       | path:05212     | Pancreatic cancer          | 8.90E-09       | 1.80E-07   |
| cluster2       | path:05215     | Prostate cancer            | 1.50E-08       | 2.60E-07   |
| cluster2       | path:05223     | Non-small cell lung cancer | 3.50E-08       | 5.40E-07   |
| cluster2       | path:04115     | p53 signaling pathway      | 4.50E-08       | 6.00E-07   |
| cluster2       | path:05222     | Small cell lung cancer     | 6.20E-08       | 7.50E-07   |
| cluster3       | path:05200     | Pathways in cancer         | 5.60E-11       | 7.00E-09   |
| cluster3       | path:05215     | Prostate cancer            | 9.60E-07       | 4.00E-05   |
| cluster3       | path:04110     | Cell cycle                 | 1.20E-06       | 3.60E-05   |
| cluster3       | path:04115     | p53 signaling pathway      | 3.60E-06       | 9.00E-05   |
| cluster3       | path:05220     | Chronic myeloid leukemia   | 9.00E-06       | 1.90E-04   |
| cluster3       | path:05214     | Glioma                     | 1.10E-04       | 1.90E-03   |
| cluster3       | path:05218     | Melanoma                   | 2.50E-04       | 3.40E-03   |
| cluster3       | path:04510     | Focal adhesion             | 8.80E-04       | 9.10E-03   |
| cluster3       | path:04360     | Axon guidance              | 9.00E-04       | 8.60E-03   |
| cluster3       | path:04010     | MAPK signaling pathway     | 1.50E-03       | 1.20E-02   |
| cluster4       | path:05200     | Pathways in cancer         | 8.40E-07       | 7.40E-05   |
| cluster4       | path:05215     | Prostate cancer            | 2.20E-06       | 9.50E-05   |
| cluster4       | path:05218     | Melanoma                   | 3.70E-06       | 1.10E-04   |
| cluster4       | path:04110     | Cell cycle                 | 4.90E-06       | 1.10E-04   |
| cluster4       | path:05214     | Glioma                     | 1.70E-05       | 3.00E-04   |
| cluster4       | path:05212     | Pancreatic cancer          | 4.10E-05       | 6.10E-04   |
| cluster4       | path:04520     | Adherens junction          | 6.40E-05       | 8.10E-04   |
| cluster4       | path:05223     | Non-small cell lung cancer | 7.10E-05       | 7.80E-04   |
| cluster4       | path:05219     | Bladder cancer             | 2.10E-04       | 2.10E-03   |
| cluster4       | path:05220     | Chronic myeloid leukemia   | 4.50E-04       | 3.90E-03   |
| cluster5       | path:05200     | Pathways in cancer         | 2.40E-17       | 2.80E-15   |

|          |            |                            |          |          |
|----------|------------|----------------------------|----------|----------|
| cluster5 | path:05220 | Chronic myeloid leukemia   | 1.40E-13 | 8.50E-12 |
| cluster5 | path:05218 | Melanoma                   | 7.40E-13 | 3.00E-11 |
| cluster5 | path:04110 | Cell cycle                 | 2.00E-12 | 6.10E-11 |
| cluster5 | path:05215 | Prostate cancer            | 3.30E-12 | 8.00E-11 |
| cluster5 | path:05219 | Bladder cancer             | 1.20E-11 | 2.40E-10 |
| cluster5 | path:05214 | Glioma                     | 2.00E-11 | 3.40E-10 |
| cluster5 | path:05223 | Non-small cell lung cancer | 4.10E-10 | 6.10E-09 |
| cluster5 | path:05222 | Small cell lung cancer     | 1.50E-09 | 2.10E-08 |
| cluster5 | path:05212 | Pancreatic cancer          | 1.70E-09 | 2.10E-08 |
| cluster6 | path:05210 | Colorectal cancer          | 2.90E-09 | 2.70E-07 |
| cluster6 | path:04110 | Cell cycle                 | 3.10E-08 | 1.50E-06 |
| cluster6 | path:05220 | Chronic myeloid leukemia   | 1.30E-07 | 4.20E-06 |
| cluster6 | path:05200 | Pathways in cancer         | 2.30E-07 | 5.60E-06 |
| cluster6 | path:04115 | p53 signaling pathway      | 6.20E-07 | 1.20E-05 |
| cluster6 | path:05223 | Non-small cell lung cancer | 1.10E-06 | 1.80E-05 |
| cluster6 | path:05212 | Pancreatic cancer          | 1.00E-05 | 1.40E-04 |
| cluster6 | path:05214 | Glioma                     | 3.90E-05 | 4.70E-04 |
| cluster6 | path:05215 | Prostate cancer            | 5.00E-05 | 5.40E-04 |
| cluster6 | path:05218 | Melanoma                   | 8.50E-05 | 8.10E-04 |
| cluster7 | path:05200 | Pathways in cancer         | 3.90E-12 | 4.10E-10 |
| cluster7 | path:04110 | Cell cycle                 | 3.00E-11 | 1.60E-09 |
| cluster7 | path:05212 | Pancreatic cancer          | 1.20E-09 | 4.10E-08 |
| cluster7 | path:05215 | Prostate cancer            | 1.70E-09 | 4.60E-08 |
| cluster7 | path:05220 | Chronic myeloid leukemia   | 2.00E-09 | 4.20E-08 |
| cluster7 | path:05219 | Bladder cancer             | 1.40E-06 | 2.50E-05 |
| cluster7 | path:05222 | Small cell lung cancer     | 5.90E-06 | 8.90E-05 |
| cluster7 | path:05210 | Colorectal cancer          | 5.90E-06 | 8.90E-05 |
| cluster7 | path:04115 | p53 signaling pathway      | 7.40E-06 | 9.70E-05 |
| cluster7 | path:04350 | TGF-beta signaling pathway | 8.20E-06 | 9.60E-05 |
| cluster8 | path:05200 | Pathways in cancer         | 5.50E-18 | 5.90E-16 |
| cluster8 | path:05215 | Prostate cancer            | 8.40E-12 | 4.50E-10 |
| cluster8 | path:05222 | Small cell lung cancer     | 3.80E-11 | 1.40E-09 |
| cluster8 | path:05220 | Chronic myeloid leukemia   | 7.80E-11 | 2.10E-09 |
| cluster8 | path:04115 | p53 signaling pathway      | 2.30E-10 | 4.90E-09 |
| cluster8 | path:05210 | Colorectal cancer          | 4.20E-10 | 7.60E-09 |
| cluster8 | path:05218 | Melanoma                   | 4.90E-09 | 7.50E-08 |
| cluster8 | path:04510 | Focal adhesion             | 2.00E-08 | 2.60E-07 |
| cluster8 | path:05212 | Pancreatic cancer          | 6.00E-08 | 7.10E-07 |
| cluster8 | path:04110 | Cell cycle                 | 1.20E-07 | 1.30E-06 |
| cluster9 | path:05200 | Pathways in cancer         | 6.60E-13 | 7.40E-11 |
| cluster9 | path:04110 | Cell cycle                 | 9.10E-08 | 5.10E-06 |
| cluster9 | path:05215 | Prostate cancer            | 1.60E-07 | 6.20E-06 |
| cluster9 | path:05212 | Pancreatic cancer          | 2.00E-07 | 5.70E-06 |
| cluster9 | path:05219 | Bladder cancer             | 3.00E-07 | 6.60E-06 |

|           |            |                            |          |          |
|-----------|------------|----------------------------|----------|----------|
| cluster9  | path:04115 | p53 signaling pathway      | 1.30E-06 | 2.50E-05 |
| cluster9  | path:05220 | Chronic myeloid leukemia   | 3.10E-06 | 4.90E-05 |
| cluster9  | path:05222 | Small cell lung cancer     | 8.00E-06 | 1.10E-04 |
| cluster9  | path:05218 | Melanoma                   | 1.50E-04 | 1.80E-03 |
| cluster9  | path:05223 | Non-small cell lung cancer | 2.30E-04 | 2.60E-03 |
| cluster10 | path:05200 | Pathways in cancer         | 4.20E-17 | 3.70E-15 |
| cluster10 | path:05212 | Pancreatic cancer          | 2.30E-11 | 1.00E-09 |
| cluster10 | path:05215 | Prostate cancer            | 2.50E-11 | 7.40E-10 |
| cluster10 | path:05220 | Chronic myeloid leukemia   | 9.00E-09 | 2.00E-07 |
| cluster10 | path:04110 | Cell cycle                 | 2.60E-08 | 4.60E-07 |
| cluster10 | path:05222 | Small cell lung cancer     | 3.10E-08 | 4.50E-07 |
| cluster10 | path:05214 | Glioma                     | 3.40E-06 | 4.30E-05 |
| cluster10 | path:05210 | Colorectal cancer          | 3.40E-06 | 3.80E-05 |
| cluster10 | path:05211 | Renal cell carcinoma       | 7.70E-06 | 7.50E-05 |
| cluster10 | path:05218 | Melanoma                   | 8.60E-06 | 7.50E-05 |

---

**Supplementary Table S5.** Univariate Cox analysis of lncRNAs/miRNAs/mRNAs in the lncACT network module of *BRCA*

| <b>Variable</b> | <b>HR (95% CI)</b> | <b>Coefficient</b> | <b>P-value</b>  |
|-----------------|--------------------|--------------------|-----------------|
| H19             | 1.17 (0.82–1.67)   | 0.16               | 3.74E-01        |
| hsa-miR-20a     | 0.93 (0.60–1.44)   | -0.08              | 7.36E-01        |
| hsa-miR-20b     | 0.67 (0.49–0.90)   | -0.40              | <b>8.00E-03</b> |
| THBS1           | 1.03 (0.65–1.62)   | 0.03               | 9.05E-01        |
| MAP3K12         | 0.85 (0.56–1.31)   | -0.16              | 4.66E-01        |
| ZNF518A         | 0.50 (0.25–1.02)   | -0.69              | 5.66E-02        |
| SLC38A3         | 0.92 (0.73–1.15)   | -0.09              | 4.65E-01        |
| hsa-miR-15a     | 0.59 (0.30–1.14)   | -0.53              | 1.18E-01        |
| hsa-miR-146a    | 0.98 (0.69–1.40)   | -0.02              | 9.19E-01        |
| BRCA1           | 1.11 (0.72–1.71)   | 0.10               | 6.46E-01        |
| BRCA2           | 0.65 (0.43–0.99)   | -0.43              | <b>4.43E-02</b> |
| SBF2-AS1        | 0.60 (0.26–1.39)   | -0.51              | 2.35E-01        |
| has-miR-17      | 0.93 (0.67–1.31)   | -0.07              | 6.92E-01        |
| WDFY3-AS2       | 1.20 (0.79–1.81)   | 0.18               | 3.88E-01        |
| HB_module       | 2.45 (1.60–3.76)   | 0.90               | <b>3.73E-05</b> |

Singificant P value ( $P < 0.05$ ) was represented as bold.

The network module of all variables in the table was tested in the last line.



**Supplementary Table S6.** Univariate Cox analysis of lncRNAs/miRNAs/mRNAs in the miR-335-associated lncACT network module of BRCA

| <b>Variable</b> | <b>HR (95% CI)</b> | <b>Coefficient</b> | <b>P value</b>  |
|-----------------|--------------------|--------------------|-----------------|
| has-miR-335     | 1.27 (0.93–1.75)   | 0.24               | 1.36E–01        |
| MERTK           | 1.46 (0.95–2.23)   | 0.38               | 8.09E–02        |
| FLG-AS1         | 1.29 (0.97–1.71)   | 0.25               | 7.85E–02        |
| LINC00968       | 1.22 (0.95–1.57)   | 0.20               | 1.25E–01        |
| Network module  | 1.95 (1.17–3.25)   | 0.67               | <b>1.04E–02</b> |

Significant P value ( $P < 0.05$ ) was represented as bold.

The network module of all variables in the table was tested in the last line.

**Supplementary Table S7.** List of KEGG pathways enriched among miR-335 targets (P<0.05).

| <b>Pathway</b> | <b>Pathway name</b>                                    | <b>P-Value</b> |
|----------------|--------------------------------------------------------|----------------|
| path:04060     | Cytokine-cytokine receptor interaction                 | 5.49E-05       |
| path:04020     | Calcium signaling pathway                              | 1.41E-04       |
| path:04062     | Chemokine signaling pathway                            | 2.20E-04       |
| path:04010     | MAPK signaling pathway                                 | 2.45E-04       |
| path:04640     | Hematopoietic cell lineage                             | 3.10E-04       |
| path:04710     | Circadian rhythm - mammal                              | 4.78E-04       |
| path:04512     | ECM-receptor interaction                               | 5.28E-04       |
| path:04610     | Complement and coagulation cascades                    | 7.50E-04       |
| path:05200     | Pathways in cancer                                     | 1.50E-03       |
| path:04970     | Salivary secretion                                     | 1.85E-03       |
| path:04920     | Adipocytokine signaling pathway                        | 2.76E-03       |
| path:04972     | Pancreatic secretion                                   | 3.64E-03       |
| path:03320     | PPAR signaling pathway                                 | 3.83E-03       |
| path:05144     | Malaria                                                | 4.03E-03       |
| path:04360     | Axon guidance                                          | 5.44E-03       |
| path:05412     | Arrhythmogenic right ventricular cardiomyopathy (ARVC) | 6.96E-03       |
| path:04670     | Leukocyte transendothelial migration                   | 7.52E-03       |
| path:05150     | Staphylococcus aureus infection                        | 9.48E-03       |
| path:04350     | TGF-beta signaling pathway                             | 1.29E-02       |
| path:05219     | Bladder cancer                                         | 1.46E-02       |
| path:05146     | Amoebiasis                                             | 1.51E-02       |
| path:05140     | Leishmaniasis                                          | 1.80E-02       |
| path:04514     | Cell adhesion molecules (CAMs)                         | 2.35E-02       |
| path:04510     | Focal adhesion                                         | 2.41E-02       |
| path:04310     | Wnt signaling pathway                                  | 2.55E-02       |
| path:04720     | Long-term potentiation                                 | 3.02E-02       |
| path:00120     | Primary bile acid biosynthesis                         | 3.14E-02       |
| path:05214     | Glioma                                                 | 3.59E-02       |
| path:04630     | Jak-STAT signaling pathway                             | 3.67E-02       |
| path:05020     | Prion diseases                                         | 3.87E-02       |
| path:04910     | Insulin signaling pathway                              | 4.36E-02       |
| path:04744     | Phototransduction                                      | 4.56E-02       |

**Table S8.** List of GO terms enriched among miR-335 targets ( $P < 1.0E-3$ ).

| <b>GO Term</b> | <b>Name</b>                                                          | <b>P-Value</b> |
|----------------|----------------------------------------------------------------------|----------------|
| GO:0006695     | cholesterol biosynthetic process                                     | 5.03E-06       |
| GO:0007267     | cell-cell signaling                                                  | 2.64E-05       |
| GO:0045669     | positive regulation of osteoblast differentiation                    | 5.21E-05       |
| GO:0007160     | cell-matrix adhesion                                                 | 6.50E-05       |
| GO:0030335     | positive regulation of cell migration                                | 8.32E-05       |
|                | positive regulation of transcription from RNA polymerase II promoter |                |
| GO:0045944     | promoter                                                             | 1.14E-04       |
| GO:0045907     | positive regulation of vasoconstriction                              | 2.90E-04       |
| GO:0008285     | negative regulation of cell proliferation                            | 2.98E-04       |
| GO:0009887     | organ morphogenesis                                                  | 3.70E-04       |
| GO:0001503     | ossification                                                         | 4.78E-04       |
| GO:0007586     | digestion                                                            | 4.83E-04       |
| GO:0060346     | bone trabecula formation                                             | 5.97E-04       |
| GO:0051894     | positive regulation of focal adhesion assembly                       | 5.97E-04       |
|                | positive regulation of canonical Wnt receptor signaling pathway      |                |
| GO:0090263     | pathway                                                              | 8.26E-04       |
| GO:0007411     | axon guidance                                                        | 8.76E-04       |
| GO:0042423     | catecholamine biosynthetic process                                   | 8.85E-04       |
| GO:0001502     | cartilage condensation                                               | 8.85E-04       |
| GO:0016525     | negative regulation of angiogenesis                                  | 8.91E-04       |
| GO:0030182     | neuron differentiation                                               | 9.16E-04       |
| GO:0051046     | regulation of secretion                                              | 9.31E-04       |

**Supplementary Table S9.** Univariate Cox analysis of lncRNAs/miRNAs/mRNAs and their combinations in the lncACT network across different diseases.

| Disease | Variable       | HR (95% CI)       | Coefficient | P-value         |
|---------|----------------|-------------------|-------------|-----------------|
| BLCA    | hsa-miR-17     | 1.21 (0.85–1.72)  | 0.19        | 2.88E–01        |
|         | RBL1           | 1.49 (1.00–2.20)  | 0.40        | <b>4.90E–02</b> |
|         | AC020915.4     | 0.89 (0.43–1.86)  | –0.11       | 7.61E–01        |
|         | NABP1          | 1.09 (0.85–1.41)  | 0.09        | 4.86E–01        |
|         | RP5-1073O3.5   | 1.52 (0.85–2.72)  | 0.42        | 1.58E–01        |
|         | RP11-113K21.5  | 0.82 (0.52–1.31)  | –0.20       | 4.10E–01        |
|         | RP11-504G3.1   | 1.79 (0.96–3.33)  | 0.58        | 6.66E–02        |
|         | Network module | 1.71 (1.11–2.62)  | 0.53        | <b>1.42E–02</b> |
| LUSC    | hsa-miR-27b    | 0.78 (0.48–1.25)  | –0.25       | 3.01E–01        |
|         | MMP13          | 0.95 (0.89–1.02)  | –0.05       | 1.52E–01        |
|         | EDNRA          | 1.02 (0.84–1.25)  | 0.02        | 8.34E–01        |
|         | YTHDF3         | 1.30 (0.91–1.85)  | 0.26        | 1.43E–01        |
|         | LINC01234      | 0.98 (0.90–1.05)  | –0.02       | 5.24E–01        |
|         | Network module | 4.55 (1.59–12.95) | 1.51        | <b>4.61E–03</b> |
| LUAD    | hsa-miR-25     | 1.23 (0.88–1.73)  | 0.21        | 2.21E–01        |
|         | KLF4           | 1.18 (0.99–1.40)  | 0.16        | 6.54E–02        |
|         | MIR22HG        | 0.84 (0.63–1.12)  | –0.18       | 2.28E–01        |
|         | Network module | 2.95 (1.37–6.34)  | 1.08        | <b>5.65E–03</b> |
| UCEC    | hsa-let-7b     | 0.66 (0.38–1.14)  | –0.42       | 1.34E–01        |
|         | hsa-miR-96     | 0.43 (0.17–1.04)  | –0.85       | 6.20E–02        |
|         | hsa-miR-182    | 0.58 (0.30–1.11)  | –0.55       | 1.02E–01        |
|         | MAL2           | 1.79 (0.91–3.49)  | 0.58        | 8.99E–02        |
|         | LINC00476      | 0.54 (0.24–1.25)  | –0.61       | 1.51E–01        |
|         | NBPF1          | 3.88 (1.00–15.03) | 1.36        | 5.00E–02        |
|         | Network module | 1.52 (1.12–2.07)  | 0.42        | <b>7.38E–03</b> |
| KIRP    | hsa-miR-30a    | 0.18 (0.06–0.56)  | –1.72       | <b>2.93E–03</b> |
|         | hsa-miR-143    | 2.39 (1.34–4.26)  | 0.87        | <b>3.13E–03</b> |
|         | AC020915.4     | 0.39 (0.13–1.14)  | –0.94       | 8.54E–02        |
|         | SEC22B         | 0.92 (0.30–2.75)  | –0.09       | 8.74E–01        |
|         | Network module | 2.20 (1.46–3.31)  | 0.79        | <b>1.73E–04</b> |

Singificant P value ( $P < 0.05$ ) was represented as bold.

The network module was tested in the last line of each cancer, respectively.

**Table S10.** Known lncACTs involving protein-coding genes and lncRNA in our framework.

| <b>LncRNAs</b> | <b>Coding-genes</b> | <b>References</b> |
|----------------|---------------------|-------------------|
| PVT1           | CDH1                | (5)               |
| PVT1           | TP53                | (5)               |
| PVT1           | RUNX1               | (5)               |
| H19            | HMGA2               | (6) (7)           |
| H19            | MYCN                | (8)               |
| LINC00152      | THBS1               | (8)               |
| HOTAIR         | HER2                | (9)               |

## REFERENCES

1. Li, J.H., Liu, S., Zhou, H., Qu, L.H. and Yang, J.H. (2014) starBase v2.0: decoding miRNA-ceRNA, miRNA-ncRNA and protein-RNA interaction networks from large-scale CLIP-Seq data. *Nucleic Acids Res*, **42**, D92-97.
2. Paraskevopoulou, M.D., Georgakilas, G., Kostoulas, N., Reczko, M., Maragkakis, M., Dalamagas, T.M. and Hatzigeorgiou, A.G. (2013) DIANA-LncBase: experimentally verified and computationally predicted microRNA targets on long non-coding RNAs. *Nucleic Acids Res*, **41**, D239-245.
3. Sumazin, P., Yang, X., Chiu, H.S., Chung, W.J., Iyer, A., Llobet-Navas, D., Rajbhandari, P., Bansal, M., Guarnieri, P., Silva, J. *et al.* (2011) An extensive microRNA-mediated network of RNA-RNA interactions regulates established oncogenic pathways in glioblastoma. *Cell*, **147**, 370-381.
4. Bandyopadhyay, S. and Mitra, R. (2009) TargetMiner: microRNA target prediction with systematic identification of tissue-specific negative examples. *Bioinformatics*, **25**, 2625-2631.
5. Paci, P., Colombo, T. and Farina, L. (2014) Computational analysis identifies a sponge interaction network between long non-coding RNAs and messenger RNAs in human breast cancer. *BMC systems biology*, **8**, 83.
6. Ma, C., Nong, K., Zhu, H., Wang, W., Huang, X., Yuan, Z. and Ai, K. (2014) H19 promotes pancreatic cancer metastasis by derepressing let-7's suppression on its target HMGA2-mediated EMT. *Tumour biology : the journal of the International Society for Oncodevelopmental Biology and Medicine*.
7. Kallen, A.N., Zhou, X.B., Xu, J., Qiao, C., Ma, J., Yan, L., Lu, L., Liu, C., Yi, J.S., Zhang, H. *et al.* (2013) The imprinted H19 lncRNA antagonizes let-7 microRNAs. *Mol Cell*, **52**, 101-112.
8. Xia, T., Liao, Q., Jiang, X., Shao, Y., Xiao, B., Xi, Y. and Guo, J. (2014) Long noncoding RNA associated-competing endogenous RNAs in gastric cancer. *Scientific reports*, **4**, 6088.
9. Liu, X.H., Sun, M., Nie, F.Q., Ge, Y.B., Zhang, E.B., Yin, D.D., Kong, R., Xia, R., Lu, K.H., Li, J.H. *et al.* (2014) Lnc RNA HOTAIR functions as a competing endogenous RNA to regulate HER2 expression by sponging miR-331-3p in gastric cancer. *Molecular cancer*, **13**, 92.
